# Supplementary material for: A Comprehensive Review on Chemotaxonomic and Phytochemical Aspects of Homoisoflavonoids, as Rare Flavonoid Derivatives
Source: MDPI journal article supplement (doi:10.3390/ijms22052735), 2021-03-08
Supplement: s1 [file s1]

**Table S3.** Homoisoflavonoids isolated from plant families except Asparagaceae and Fabaceae

| Plant species                | Plant family  | Subjected soluble fraction/plant part | Method of isolation or purification (the final steps)                                                                                                  | Name                                                                                                                                                                                                                                                                                                                                                                                                                                                                                                                                                                                                                                                                                                                                                                   | Reference |
|------------------------------|---------------|---------------------------------------|--------------------------------------------------------------------------------------------------------------------------------------------------------|------------------------------------------------------------------------------------------------------------------------------------------------------------------------------------------------------------------------------------------------------------------------------------------------------------------------------------------------------------------------------------------------------------------------------------------------------------------------------------------------------------------------------------------------------------------------------------------------------------------------------------------------------------------------------------------------------------------------------------------------------------------------|-----------|
| <i>Cucumis bisexualis</i>    | Cucurbitaceae | EtOAc/Fr                              | CC [PE–EtOAc 6:1 to 2:1], SLH [MeOH–H <sub>2</sub> O 9:1]                                                                                              | 3-(4'-hydroxybenzylidene)-8-(3'',3''-dimethylfuran-2''-one)-6,7-dimethoxy-chroman-4-one<br>3-(3'-methoxy-4'-hydroxybenzylidene)-8-(3'',3''-dimethyl-furan-2''-one)-7-methoxy-chroman-4-one<br>3-(benzo-dioxol-1'-ylmethylene)-8-(3'',3''-dimethyl-furan-2''-one)-6-hydroxy-chroman-4-one<br>3-(benzo-dioxol-1'-ylmethylene)-8-(3'',3''-dimethyl-furan-2''-one)-6-hydroxy-5,7-dimethoxychroman-4-one<br>7-O-methylpunctatin<br>7-O-methyl-3'-hydroxypunctatin<br>punctatin<br>(3E)-3-(1,3-benzodioxol-5-ylmethylene)-2,3-dihydro-7-hydroxy-4H-1-benzopyran-4-one<br><br>(3E)-3-(1,3-benzodioxol-5-ylmethylene)-2,3-dihydro-7-methoxy-4H-1-benzopyran-4-one<br>isointricatinol<br>3-(4'-methoxybenzylidene)-5,7-dihydroxy-6-methoxychroman-4-one<br>8-methoxybonducellin | [130]     |
| <i>Polygonum senegalense</i> | Polygonaceae  | Me <sub>2</sub> CO/AP                 | CC [PE–Bz–CHCl <sub>3</sub> ; MeOH], CC [PE–CHCl <sub>3</sub> ]                                                                                        | 5,7-dihydroxy-3-(hydroxy-phenyl-methyl)-6-methoxy-chroman-4-one (syn. polygohomoisoflavanone)                                                                                                                                                                                                                                                                                                                                                                                                                                                                                                                                                                                                                                                                          | [131]     |
| <i>Polygonum ferrugineum</i> |               | CH <sub>2</sub> Cl <sub>2</sub> /L    | VLC [CHCl <sub>3</sub> –EtOAc; Me <sub>2</sub> CO–MeOH], CC [NHEX–EtOAc; EtOAc–MeOH; MeOH], PTLC [CHCl <sub>3</sub> –EtOAc–HCO <sub>2</sub> H 90:10:1] | 5,7-dihydroxy-6-methoxy-3-(9-hydroxy-phenylmethyl)-chroman-4-one                                                                                                                                                                                                                                                                                                                                                                                                                                                                                                                                                                                                                                                                                                       | [132]     |
| <i>Portulaca oleracea</i>    | Portulacaceae | hydro-methanolic (85%)/n.d            | HPLC [CHCl <sub>3</sub> –MeOH 95:5]<br>HPLC [MeCN–H <sub>2</sub> O 57:43 to 53:47]                                                                     | portulacanone E<br>portulacanone A<br>portulacanone C                                                                                                                                                                                                                                                                                                                                                                                                                                                                                                                                                                                                                                                                                                                  | [125]     |

|                                             |                              |                    |  |  |                                                                                                                               |                                                                                                                     |           |
|---------------------------------------------|------------------------------|--------------------|--|--|-------------------------------------------------------------------------------------------------------------------------------|---------------------------------------------------------------------------------------------------------------------|-----------|
|                                             |                              |                    |  |  |                                                                                                                               | portulacanone B                                                                                                     |           |
|                                             |                              |                    |  |  |                                                                                                                               | HPLC [MeOH–H <sub>2</sub> O 30:70]                                                                                  |           |
|                                             |                              |                    |  |  |                                                                                                                               | portulacanone E                                                                                                     |           |
|                                             |                              |                    |  |  |                                                                                                                               | portulacanone A                                                                                                     |           |
|                                             |                              |                    |  |  |                                                                                                                               | HPLC [MeCN–H <sub>2</sub> O 45:55]                                                                                  |           |
|                                             |                              |                    |  |  |                                                                                                                               | portulacanone B                                                                                                     |           |
|                                             |                              |                    |  |  |                                                                                                                               | portulacanone C                                                                                                     |           |
|                                             |                              |                    |  |  |                                                                                                                               | portulacanone F                                                                                                     |           |
|                                             |                              |                    |  |  |                                                                                                                               | SLH [NHEX–CHCl <sub>3</sub> –MeCN 5:44:1], HPLC [MeOH–H <sub>2</sub> O 27:73]                                       |           |
|                                             |                              |                    |  |  |                                                                                                                               | portulacanone D                                                                                                     |           |
|                                             |                              |                    |  |  |                                                                                                                               | n.d                                                                                                                 |           |
|                                             |                              |                    |  |  |                                                                                                                               | 2,2'-dihydroxy-4',6'-dimethoxychalcone                                                                              |           |
|                                             |                              |                    |  |  |                                                                                                                               | CC [CHCl <sub>3</sub> –MeOH 100:0 to 0:100], HPLC [MeOH–H <sub>2</sub> O 25:75]                                     |           |
|                                             |                              |                    |  |  |                                                                                                                               | portulacanone A                                                                                                     |           |
| CH <sub>2</sub> Cl <sub>2</sub> /n.d        |                              |                    |  |  | RP-CC [MeOH–H <sub>2</sub> O 50:50 to 100:0], CC [CHCl <sub>3</sub> –MeOH 100:0 to 0:100], HPLC [MeOH–H <sub>2</sub> O 25:75] | portulacanone D                                                                                                     | [126]     |
|                                             |                              |                    |  |  |                                                                                                                               | 5,7-dimethoxy-3-(2'-hydroxybenzyl)-4-chromanone                                                                     |           |
|                                             |                              |                    |  |  |                                                                                                                               | 5-hydroxy-6,7-dimethoxy-3-(2'-hydroxybenzyl)-4-chromanone                                                           |           |
|                                             |                              |                    |  |  |                                                                                                                               | (E)-5-hydroxy-7-methoxy-3-(2'-hydroxybenzyl)-4-chromanone                                                           |           |
| EtOAc/AP                                    |                              |                    |  |  | CC [CHCl <sub>3</sub> –MeOH 10:0, 9.5:0.5, 9:1, 8.5:1.5, 8:2, 7:3, 0:10; 40:1 to 20:1]                                        | portulacanone A (syn. 2'-hydroxy- 5,7-dimethoxy-3-benzylchroman-4-one)                                              | [124]     |
|                                             |                              |                    |  |  |                                                                                                                               | portulacanone C (syn. 5,2'-dihydroxy-6,7-dimethoxy-3-benzylchroman-4-one)                                           |           |
|                                             |                              |                    |  |  |                                                                                                                               | CC [CHCl <sub>3</sub> –MeOH 10:0, 9.5:0.5, 9:1, 8.5:1.5, 8:2, 7:3, 0:10], CC [CHCl <sub>3</sub> –MeOH 30:1 to 10:1] |           |
|                                             |                              |                    |  |  |                                                                                                                               | portulacanone B (syn. 2'-hydroxy-5,6,7-trimethoxy-3-benzylchroman-4-one)                                            |           |
|                                             |                              |                    |  |  | CC [CHCl <sub>3</sub> –MeOH 10:0, 9.5:0.5, 9:1, 8.5:1.5, 8:2, 7:3, 0:10], CC [CHCl <sub>3</sub> –MeOH 10:1 to 8:1]            | portulacanone D (syn. 5,2'-dihydroxy-7-methoxy-3-benzylidenechroman-4-one)                                          | [128,129] |
|                                             |                              |                    |  |  |                                                                                                                               | (±)-5,7-dihydroxy-8-methyl-3-(2',4'-dihydroxybenzyl)chroman-4-one                                                   |           |
|                                             |                              |                    |  |  |                                                                                                                               | (±)-5,7-dihydroxy-6,8-dimethyl-3-(2',4'-dihydroxybenzyl)chroman-4-one                                               |           |
|                                             |                              |                    |  |  |                                                                                                                               | 5,7-dihydroxy-6-methyl-3-(2',4'-dihydroxybenzyl)chroman-4-one                                                       |           |
| “Gan Luo Xin”<br>Chinese herbal<br>medicine | combining over 20<br>species | <i>n</i> -BuOH/n.d |  |  | HPLC [MeOH–H <sub>2</sub> O 60:40]                                                                                            | disporopsin                                                                                                         | [133]     |
|                                             |                              |                    |  |  |                                                                                                                               |                                                                                                                     |           |
|                                             |                              |                    |  |  |                                                                                                                               |                                                                                                                     |           |
|                                             |                              |                    |  |  |                                                                                                                               |                                                                                                                     |           |

AP: aerial part; Bz: benzene; CC: column chromatography; CHCl<sub>3</sub>: chloroform; CH<sub>2</sub>Cl<sub>2</sub>: dichloromethane; EtOAc: ethyl acetate; Fr: fruit; H<sub>2</sub>O: water; HCO<sub>2</sub>H: formic acid; HPLC: high-performance liquid chromatography; L: leaf; MeOH: methanol; Me<sub>2</sub>CO: acetone; MeCN: acetonitrile; *n*-BuOH: butanol; n.d: not determined; NHEX: *n*-hexane; PE: petroleum ether; PTLC: preparative-thin layer chromatography; recryst.: recrystallization; RP-CC: reverse-phase column chromatography; SLH: Sephadex® LH-20
