# Supplementary material for: A Comprehensive Review on Chemotaxonomic and Phytochemical Aspects of Homoisoflavonoids, as Rare Flavonoid Derivatives
Source: MDPI journal article supplement (doi:10.3390/ijms22052735), 2021-03-08
Supplement: s1 [file s1]

**Table S2.** Homoisoflavonoid derivatives isolated from Fabaceae family

| Plant species                  | Subjected soluble fraction/plant part      | Method of isolation/purification                                                                                                                                           | Name                                                                                           | Reference |
|--------------------------------|--------------------------------------------|----------------------------------------------------------------------------------------------------------------------------------------------------------------------------|------------------------------------------------------------------------------------------------|-----------|
| <i>Caesalpinia bahamensis</i>  | MeOH/R                                     | FC [CH <sub>2</sub> Cl <sub>2</sub> –EtOAc], HPLC [H <sub>2</sub> O (0.1% HCO <sub>2</sub> H)–MeCN (0.1% HCO <sub>2</sub> H)]                                              | metasappanin [syn. 3-(2-hydroxy-4-methoxybenzyl)chromane-4,7-diol]                             | [92]      |
| <i>Caesalpinia bonduc</i>      | EtOH/bark                                  | CC [NHEX–CHCl <sub>3</sub> 100:0 to 0:100; CHCl <sub>3</sub> –MeOH 100:0 to 0:100], CC [CHCl <sub>3</sub> –MeOH 85:15], PTLC [CH <sub>2</sub> Cl <sub>2</sub> –MeOH 75:25] | caesalpinianone                                                                                | [5]       |
|                                |                                            |                                                                                                                                                                            | 6- <i>O</i> -methylcaesalpinianone                                                             |           |
| <i>Caesalpinia digyna</i>      | MeOH/R                                     | CC [NHEX–EtOAc 65:35 to 60:40]                                                                                                                                             | ( <i>Z</i> )-7,8-dihydroxy-3-(4'-methoxybenzyl)chroman-4-one (syn. isointricatinol)            | [93]      |
|                                |                                            | CC [NHEX–EtOAc 75:25 to 65:35]                                                                                                                                             | intricatinol                                                                                   |           |
|                                |                                            | HPLC [MeOH–H <sub>2</sub> O 60:40]                                                                                                                                         | ( <i>Z</i> )-7-hydroxy-8-methoxy-3-(4'-methoxybenzyl)chroman-4-one                             |           |
|                                |                                            |                                                                                                                                                                            | 8-methoxybonducellin                                                                           |           |
|                                |                                            | HPLC [MeOH–H <sub>2</sub> O 75:25]                                                                                                                                         | <i>Z</i> -eucomine                                                                             |           |
|                                |                                            |                                                                                                                                                                            | <i>E</i> -eucomine                                                                             |           |
|                                |                                            | HPLC [MeOH–H <sub>2</sub> O 70:30]                                                                                                                                         | isobonducellin                                                                                 |           |
| <i>Caesalpinia japonica</i>    | CH <sub>2</sub> Cl <sub>2</sub> /heartwood |                                                                                                                                                                            | bonducellin                                                                                    | [94]      |
|                                |                                            | SLH                                                                                                                                                                        | demethyleucomine                                                                               |           |
|                                |                                            | PTLC [CHCl <sub>3</sub> –EtOAc 9:1]                                                                                                                                        | 3'-deoxy-4- <i>O</i> -methylsappanol (syn. 3,7-dihydroxy-3-(4-hydroxybenzyl)-4-methoxychroman) |           |
|                                |                                            |                                                                                                                                                                            | 4- <i>O</i> -methylepisappanol                                                                 |           |
|                                |                                            | CC                                                                                                                                                                         | 4- <i>O</i> -methylsappanol                                                                    |           |
|                                |                                            | PTLC [CHCl <sub>3</sub> –EtOAc 7:1]                                                                                                                                        | sappanol                                                                                       |           |
|                                |                                            |                                                                                                                                                                            | episappanol                                                                                    |           |
| <i>Caesalpinia latisiliqua</i> | EtOAc/twig                                 |                                                                                                                                                                            | sappanone A                                                                                    | [95]      |
|                                |                                            | PTLC                                                                                                                                                                       | sappanone B                                                                                    |           |
| <i>Caesalpinia latisiliqua</i> | EtOAc/twig                                 | HPLC [MeCN–H <sub>2</sub> O 35:65]                                                                                                                                         | (3 <i>S</i> )-dihydrobonducellin 8- <i>O</i> -β-D-glucopyranoside                              | [95]      |
| <i>Caesalpinia millettii</i>   | Me <sub>2</sub> CO/St                      | SLH [MeOH]                                                                                                                                                                 | 8-methoxyisobonducellin                                                                        | [96]      |
|                                |                                            |                                                                                                                                                                            | 8-methoxybonducellin                                                                           |           |
|                                |                                            | CC [CHCl <sub>3</sub> –MeOH 10:0 to 1:1], CC [NHEX–CHCl <sub>3</sub> 9:1]                                                                                                  | eucomin                                                                                        |           |

|                           |                 |                                                                                                                                                                                                                  |                                                                                                                                     |       |
|---------------------------|-----------------|------------------------------------------------------------------------------------------------------------------------------------------------------------------------------------------------------------------|-------------------------------------------------------------------------------------------------------------------------------------|-------|
| <i>Caesalpinia sappan</i> | EtOAc/heartwood | CC [NHEX–EtOAc 9:1]                                                                                                                                                                                              | bonducellin                                                                                                                         | [101] |
|                           |                 | SLH [MeOH], CC [NHEX–EtOAc 7:3]                                                                                                                                                                                  | intricatinol                                                                                                                        |       |
|                           |                 | RP-CC [MeOH–H <sub>2</sub> O 40:60]                                                                                                                                                                              | sappanone A                                                                                                                         |       |
|                           |                 |                                                                                                                                                                                                                  | 3'-deoxy-4- <i>O</i> -methylsappanol                                                                                                |       |
|                           |                 | RP-CC [MeCN–H <sub>2</sub> O 60:40]                                                                                                                                                                              | 3-deoxysappanone B                                                                                                                  |       |
|                           |                 |                                                                                                                                                                                                                  | sappanol                                                                                                                            |       |
|                           |                 |                                                                                                                                                                                                                  | 7,3',4'-trihydroxy-3-benzyl-2 <i>H</i> -chromene                                                                                    |       |
|                           |                 |                                                                                                                                                                                                                  | episappanol                                                                                                                         |       |
|                           |                 | RP-CC [MeCN–H <sub>2</sub> O 70:30]                                                                                                                                                                              | sappanone B                                                                                                                         |       |
|                           |                 |                                                                                                                                                                                                                  | 4-(7-hydroxy-2,2-dimethyl-9 $\beta$ <i>H</i> -1,3,5-trioxa-cyclopenta[ $\alpha$ ]naphthalene-3-lymethyl)-benzene-1,2-diol           |       |
|                           |                 | RP-CC [MeOH–H <sub>2</sub> O 80:20]                                                                                                                                                                              | 4- <i>O</i> -methylepisappanol                                                                                                      |       |
|                           |                 | SLH                                                                                                                                                                                                              | 4- <i>O</i> -methylsappanol                                                                                                         |       |
|                           |                 | HPLC [MeOH–H <sub>2</sub> O 30:70 (0.1% TFA)]                                                                                                                                                                    | caesalпинiaphenol A                                                                                                                 | [102] |
|                           |                 |                                                                                                                                                                                                                  | 3-deoxysappanone B                                                                                                                  |       |
|                           |                 |                                                                                                                                                                                                                  | sappanone A                                                                                                                         |       |
|                           |                 | HPLC [MeOH–H <sub>2</sub> O 40:60 (0.1% TFA)]                                                                                                                                                                    | caesalпинiaphenol B                                                                                                                 |       |
|                           |                 | HPLC [MeOH–H <sub>2</sub> O 35:65 (0.1% TFA)]                                                                                                                                                                    | 3'-deoxy-4- <i>O</i> -methylepisappanol                                                                                             |       |
|                           |                 |                                                                                                                                                                                                                  | 3'-deoxysappanone A                                                                                                                 |       |
|                           |                 | HSCCC [CHCl <sub>3</sub> –MeOH–H <sub>2</sub> O 4:3:2]                                                                                                                                                           | 3'-deoxysappanol                                                                                                                    | [103] |
|                           |                 |                                                                                                                                                                                                                  | 3-deoxysappanone B                                                                                                                  |       |
|                           |                 |                                                                                                                                                                                                                  | 4- <i>O</i> -methylsappanol                                                                                                         |       |
|                           |                 |                                                                                                                                                                                                                  | brazilin                                                                                                                            |       |
|                           |                 | CC [CHCl <sub>3</sub> –MeOH 95:5], CC [CHCl <sub>3</sub> –Me <sub>2</sub> CO 95:5, 92:8, 88:12], SLH [MeOH–H <sub>2</sub> O 70:30]                                                                               | 7,3',4'-trihydroxy-3-benzyl-2 <i>H</i> -chromene                                                                                    | [104] |
|                           |                 |                                                                                                                                                                                                                  | 4- <i>O</i> -methylsappanol                                                                                                         |       |
|                           |                 |                                                                                                                                                                                                                  | 4- <i>O</i> -methylepisappanol                                                                                                      |       |
|                           |                 |                                                                                                                                                                                                                  | 3'-deoxy-4- <i>O</i> -methylsappanol                                                                                                |       |
|                           |                 | CC [CHCl <sub>3</sub> –MeOH 95:5], CC [CHCl <sub>3</sub> –Me <sub>2</sub> CO 9:1, 85:15, 8:2, 7:3], CC [CH <sub>2</sub> Cl <sub>2</sub> –Me <sub>2</sub> CO 92:8, 9:1, 85:15], SLH [MeOH–H <sub>2</sub> O 60:40] | caesalpin J                                                                                                                         |       |
|                           |                 |                                                                                                                                                                                                                  | protosappanin A                                                                                                                     |       |
|                           |                 | CC [CHCl <sub>3</sub> –MeOH 100:0 to 70:30], CC [CHCl <sub>3</sub> –MeOH 95:5 to 80:20], SLH [CHCl <sub>3</sub> –                                                                                                | 3',4-di- <i>O</i> -methylepisappanol (syn. (3 <i>R</i> ,4 <i>R</i> )-3,7-dihydroxy-3-(3'-methoxy-4'-hydroxybenzyl)-4-methoxychroman |       |
|                           |                 |                                                                                                                                                                                                                  | caesalпинiaphenol F                                                                                                                 |       |

|                                |                            |                                                                                         |                                                                                                                                                                                                                                                                                                          |       |
|--------------------------------|----------------------------|-----------------------------------------------------------------------------------------|----------------------------------------------------------------------------------------------------------------------------------------------------------------------------------------------------------------------------------------------------------------------------------------------------------|-------|
|                                |                            | MeOH 65:35], RP-CC [MeOH–H <sub>2</sub> O 60:40],<br>HPLC [MeOH–H <sub>2</sub> O 50:50] |                                                                                                                                                                                                                                                                                                          |       |
|                                | MeOH/heartwood             | SLH [MeOH], PTLC                                                                        | 7-hydroxy-3-(4'-hydroxybenzylidene)-chroman-4-one<br>3,7-dihydroxy-3-(4'-hydroxybenzyl)-chroman-4-one<br>3,4,7-trihydroxy-3-(4'-hydroxybenzyl)-chroman<br>7-hydroxy-8-methoxy-3-(4'-methoxybenzylidene)-chroman-one<br>8-methoxybonduallin                                                               | [105] |
|                                | n.d/heartwood              | n.d                                                                                     | 4-O-methylsappanol<br>protosappanin A<br>brazilin<br>caeasalpin J                                                                                                                                                                                                                                        | [106] |
|                                | n.d                        | CPC [EtOAc–MeCN–H <sub>2</sub> O 1:1:2]                                                 | sappanol<br>brazilin                                                                                                                                                                                                                                                                                     | [107] |
| <i>Caesalpinia pulcherrima</i> | CHCl <sub>3</sub> –MeOH/AP | PTLC [NHEX–EtOAc 3:10]                                                                  | [(3E)-3-(1,3-benzodioxol-5-ylmethylene)-2,3-dihydro-7-hydroxy-4H-1-benzopyran-4-one]<br>[(3E)-2,3-dihydro-7-hydroxy-3-[(4-methoxyphenyl)methylene]-4H-1-benzopyran-4-one] (syn. bonducellin)                                                                                                             | [108] |
|                                |                            | PTLC [NHEX–EtOAc 1:9]                                                                   | [(3E)-3-(1,3-benzodioxol-5-ylmethylene)-2,3-dihydro-7-methoxy-4H-1-benzopyran-4-one]<br>[(3E)-2,3-dihydro-7-methoxy-3-[(4-methoxy-phenyl)methylene]-4H-1-benzopyran-4-one] (syn. 7-O-methyl bonducellin)<br>(3E)-2,3-dihydro-6,7-dimethoxy-3[(3-hydroxy-4-methoxyphenyl)methylene]-4H-1-benzopyran-4-one |       |
|                                |                            | PTLC [NHEX–EtOAc 4:10]                                                                  | [(3E)-2,3-dihydro-3[(3,4-dihydroxyphenyl)methylene]-7-hydroxy-4H-1-benzopyran-4-one] (syn. sappanone A)<br>[(3E)-2,3-dihydro-7-hydroxy-3-[(3-hydroxy-4-methoxyphenyl)-methylene]-4H-1-benzopyran-4-one]                                                                                                  |       |
|                                |                            | CC [NHEX–EtOAc 1.5:10]                                                                  | [(3E)-2,3-dihydro-3-[(3,4-dimethoxyphenyl)methylene]-7-methoxy-4H-1-benzopyran-4-one]                                                                                                                                                                                                                    |       |
|                                |                            | PTLC [NHEX–EtOAc 3.5:10]                                                                | [(3E)-2,3-dihydro-3-[(2,4-dimethoxyphenyl)methylene]-7-hydroxy-4H-1-benzopyran-1-one] (syn. 2'-methoxybonducellin)                                                                                                                                                                                       |       |
|                                | NHEX/WP                    | CC [NHEX–EtOAc 95:5]                                                                    | (E)-7-methoxy-3-(4'-methoxybenzylidene)chroman-4-one                                                                                                                                                                                                                                                     | [109] |
|                                | Me <sub>2</sub> CO/WP      | CC [NHEX–EtOAc 75:25]                                                                   | (Z)-7-hydroxy-3-(4'-methoxybenzylidene)chroman-4-one (syn. isobonducellin)                                                                                                                                                                                                                               |       |

|                                  |                                     |                                                                                                                                |                                                                                  |           |
|----------------------------------|-------------------------------------|--------------------------------------------------------------------------------------------------------------------------------|----------------------------------------------------------------------------------|-----------|
|                                  |                                     | CC [NHEX–EtOAc 70:30]                                                                                                          | ( <i>E</i> )-7-hydroxy-3-(4'-methoxybenzylidene)chroman-4-one (syn. bonducellin) | [110]     |
|                                  |                                     | CC [NHEX–EtOAc 60:40]                                                                                                          | ( <i>E</i> )-7-hydroxy-3-(2',4'-dimethoxybenzylidene)chroman-4-one               |           |
|                                  |                                     |                                                                                                                                | ( <i>E</i> )-7-hydroxy-3-(3',4',5'-trimethoxybenzylidene)chroman-4-one           |           |
|                                  | Me <sub>2</sub> CO/AP               | CC [NHEX–EtOAc 60:40, 65:35]                                                                                                   | isobonducellin                                                                   |           |
|                                  |                                     | CC [NHEX–EtOAc 60:40]                                                                                                          | bonducellin                                                                      |           |
|                                  |                                     | CC [NHEX–EtOAc 60:40]                                                                                                          | isobonducellin                                                                   |           |
|                                  | CHCl <sub>3</sub> /St               |                                                                                                                                | bonducellin                                                                      | [110–112] |
|                                  |                                     | CC [CHCl <sub>3</sub> –EtOAc], recryst. [CHCl <sub>3</sub> , MeOH]                                                             | bonducellin                                                                      |           |
|                                  |                                     | CC [CHCl <sub>3</sub> –EtOAc], PTLC [CHCl <sub>3</sub> –EtOAc 3:1]                                                             | 8-methoxybonducellin                                                             |           |
|                                  | <i>n</i> -BuOH/cork tissue          | CC [NHEX–Me <sub>2</sub> CO 5:1 to 1:1], HPLC [MeCN–H <sub>2</sub> O 37:63], PTLC [CHCl <sub>3</sub> –Me <sub>2</sub> CO 12:1] | dihydrobonducellin                                                               | [114]     |
|                                  |                                     |                                                                                                                                | 2'-methoxydihydrobonducellin                                                     |           |
|                                  |                                     |                                                                                                                                | 2'-methoxybonducellin                                                            |           |
|                                  |                                     |                                                                                                                                | isobonducellin                                                                   |           |
|                                  |                                     | CC [NHEX–Me <sub>2</sub> CO 5:1 to 1:1], recryst.                                                                              | bonducellin                                                                      |           |
| <i>Crotalaria pallida</i> Ait    | CH <sub>2</sub> Cl <sub>2</sub> /Se | SLH [CH <sub>2</sub> Cl <sub>2</sub> –MeOH 2:1], HPLC [MeOH–H <sub>2</sub> O 58:42]                                            | cropalliflavone A                                                                | [115]     |
|                                  |                                     |                                                                                                                                | cropalliflavone B                                                                |           |
| <i>Heamatoxylon campechianum</i> | EtOAc/St                            | HPLC [MeCN–H <sub>2</sub> O 10:90 to 35:65]                                                                                    | hematoxylol                                                                      | [14]      |
|                                  |                                     |                                                                                                                                | hematoxylone                                                                     |           |
|                                  |                                     |                                                                                                                                | isohematoxylin                                                                   |           |
|                                  |                                     |                                                                                                                                | epihematoxylol                                                                   |           |
|                                  |                                     |                                                                                                                                | sappanone B                                                                      |           |
|                                  |                                     | HPLC [MeCN–H <sub>2</sub> O 10:90 to 30:70]                                                                                    | 4- <i>O</i> -methylepihematoxylol                                                |           |
|                                  |                                     |                                                                                                                                | hematoxylene                                                                     |           |
|                                  |                                     |                                                                                                                                | 4- <i>O</i> -methylsappanol                                                      |           |
|                                  |                                     |                                                                                                                                | hematoxin                                                                        |           |
|                                  |                                     |                                                                                                                                | 4- <i>O</i> -methylhematoxylol                                                   |           |
|                                  | CH <sub>2</sub> Cl <sub>2</sub> /St | SLH [MeOH]                                                                                                                     | epihematoxin                                                                     |           |
|                                  |                                     |                                                                                                                                | sappanol                                                                         |           |
|                                  |                                     |                                                                                                                                | 3'-deoxy- <i>O</i> -methylsappanol                                               |           |
|                                  |                                     |                                                                                                                                | 3'-deoxy-sappanone A                                                             |           |
|                                  |                                     | CC [CHCl <sub>3</sub> –MeOH 40:1 to 6:1]                                                                                       | 3'-deoxy-sappanone A                                                             |           |
|                                  |                                     | SLH [CHCl <sub>3</sub> –MeOH 1:1]                                                                                              | sappanene                                                                        |           |

|                                  |                             |                                                                                              |                                                                                                          |       |
|----------------------------------|-----------------------------|----------------------------------------------------------------------------------------------|----------------------------------------------------------------------------------------------------------|-------|
|                                  |                             | CC [Me <sub>2</sub> CO–PE 3:1 to 1:1]                                                        | sappanone A                                                                                              |       |
|                                  |                             | CC [CHCl <sub>3</sub> –MeOH 100:1 to 50:1]                                                   | isoliquiritigenin                                                                                        |       |
|                                  |                             |                                                                                              | bonducellin                                                                                              |       |
|                                  |                             | CC [Me <sub>2</sub> CO–PE 6:1 to 3:1]                                                        | ( <i>E</i> )-eucomin                                                                                     |       |
|                                  |                             | CC [Me <sub>2</sub> CO–PE 3:1 to 1:1]                                                        | butein                                                                                                   |       |
|                                  |                             |                                                                                              | sappanchalcone                                                                                           |       |
|                                  |                             | CC [CHCl <sub>3</sub> –MeOH 100:1 to 40:1]                                                   | 3'-deoxy-sappanchalcone                                                                                  |       |
|                                  | EtOAc/heartwood             | RP-CC [MeOH–H <sub>2</sub> O 10:90 to 50:50], HPLC<br>[MeCN–H <sub>2</sub> O 10:90 to 30:70] | hematoxylol B                                                                                            | [116] |
|                                  |                             |                                                                                              | epihematoxylol B                                                                                         |       |
|                                  |                             |                                                                                              | caesalpin J                                                                                              |       |
|                                  |                             | HPLC [MeCN–H <sub>2</sub> O 10:90 to 35:65]                                                  | 1'- <i>O</i> -methylhematoxylol B                                                                        |       |
|                                  | MeOH/heartwood              | CC [CHCl <sub>3</sub> –MeOH 20:1 to 3:1], SLH<br>[CHCl <sub>3</sub> –MeOH 1:1]               | 1'- <i>O</i> -methylepihematoxylol B                                                                     | [117] |
|                                  |                             |                                                                                              | hematoxylin                                                                                              |       |
|                                  |                             |                                                                                              | hematoxylol A                                                                                            |       |
|                                  |                             | CC [CH <sub>2</sub> Cl <sub>2</sub> –Me <sub>2</sub> CO]                                     | 4- <i>O</i> -methylhematoxylol                                                                           |       |
| <i>Hoffmanosseggia intricata</i> | CHCl <sub>3</sub> /R        | CC [CH <sub>2</sub> Cl <sub>2</sub> –MeOH 95:5, 98:2], recryst.                              | hematoxin                                                                                                | [12]  |
|                                  |                             |                                                                                              | intricatin (syn. 7,4'-dimethoxy-8-hydroxyhomoisoflavone)                                                 |       |
| <i>Pterocarpus marsupium</i>     | Et <sub>2</sub> O/heartwood | CC [Bz; Bz–EtOAc; Bz–EtOAc 7:3]                                                              | intricatinol (syn. 4'-methoxy-7,8-dihydroxyhomoisoflavone)                                               |       |
|                                  |                             |                                                                                              | pteromarsupone (syn. 6-hydroxy-7- <i>O</i> -methyl-3-(3-hydroxy-4- <i>O</i> -methylbenzyl)chroman-4-one) | [118] |
| <i>Stuhlmannia moavi</i>         | EtOAc/R                     | SLH [CH <sub>2</sub> Cl <sub>2</sub> –MeOH 1:1], recryst.                                    |                                                                                                          | [119] |
|                                  |                             |                                                                                              | bonducellin                                                                                              |       |

AP: aerial part; Bz: benzene; CC: column chromatography; CHCl<sub>3</sub>: chloroform; CH<sub>2</sub>Cl<sub>2</sub>: dichloromethane; CPC: centrifugal partition chromatography; EtOAc: ethyl acetate; EtOH: ethanol; H<sub>2</sub>O: water; HPLC: high-performance liquid chromatography; HSCCC: high-speed counter-current chromatography; L: leaf; MeOH: methanol; Me<sub>2</sub>CO: acetone; MeCN: acetonitrile; *n*-BuOH: butanol; n.d: not determined; NHEx: *n*-hexane; PE: petroleum ether; PTLC: preparative-thin layer chromatography; R: root; recryst.: recrystallization; RP-CC: reverse-phase column chromatography; Se: seed; SLH: Sephadex® LH-20; St: stem; TFA: trifluoroacetic acid; WP: whole part
