# Supplementary material for: A Comprehensive Review on Chemotaxonomic and Phytochemical Aspects of Homoisoflavonoids, as Rare Flavonoid Derivatives
Source: MDPI journal article supplement (doi:10.3390/ijms22052735), 2021-03-08
Supplement: s1 [file s1]

**Table S1.** Isolated homoisoflavonoid derivatives from Asparagaceae family

| Plant species            | Subjected soluble fraction/plant part | Method of isolation/purification                                      | Name                                                                 | Reference |
|--------------------------|---------------------------------------|-----------------------------------------------------------------------|----------------------------------------------------------------------|-----------|
| <i>Agave sisalana</i>    | EtOAc/L                               | HPLC [NHEX–EtOAc 7:1; NHEX–EtOAc–Me <sub>2</sub> CO 7:1:0.5]          | 7- <i>O</i> -methyleucomol                                           | [73]      |
|                          |                                       |                                                                       | 3'-deoxysappanon                                                     |           |
|                          |                                       |                                                                       | (±)-3,9-dihydroeucomin                                               |           |
|                          |                                       | HPLC [NHEX–EtOAc 3.5:1; NHEX–EtOAc–Me <sub>2</sub> CO 7:1:1]          | dihydro-bonducellin                                                  |           |
|                          |                                       |                                                                       | 7-hydroxy-3-(4-hydroxybenzyl)chroman                                 |           |
|                          |                                       | HPLC [NHEX–EtOAc 3:1]                                                 | 5,7-dihydroxy-3-(4'-hydroxy-benzyl)-4-chromanone                     |           |
| <i>Agave tequilana</i>   | EtOAc/Fr<br>Me <sub>2</sub> CO/Fr     | CC [NHEX–EtOAc 9:1 to 1:9], FC [NHEX–EtOAc 8:2]                       | 5,7-dihydroxy-3-(4-methoxybenzyl)-chroman-4-one                      | [74]      |
|                          |                                       |                                                                       | 7-hydroxy-3-(4-hydroxybenzyl)-chroman-4-one                          |           |
|                          |                                       |                                                                       | 4'-demethyl-3,9-dihydro-punctatin                                    |           |
| <i>Albuca fastigiata</i> | CH <sub>2</sub> Cl <sub>2</sub> /bulb | CC [CH <sub>2</sub> Cl <sub>2</sub> –MeOH 99:1]                       | 3,5-dihydroxy-7-methoxy-3-(4'-hydroxy-3'-methoxybenzyl)-4-chromanone | [79]      |
| <i>Bellevalia eigii</i>  | MeOH–MeCN/bulb                        | HPLC [MeOH–H <sub>2</sub> O (0.1% HCO <sub>2</sub> H) 70:30 to 90:10] | 7- <i>O</i> -methyl-3,9-dihdropunctatin                              | [53]      |
|                          |                                       | HPLC [MeOH–H <sub>2</sub> O (0.1% HCO <sub>2</sub> H) 50:50 to 60:40] | 7- <i>O</i> -methylpunctatin                                         |           |
|                          |                                       |                                                                       | 8- <i>O</i> -demethyl-7- <i>O</i> -methyl-3,9-dihdropunctatin        |           |
|                          |                                       |                                                                       | 7- <i>O</i> -methyl-3'-hydroxy-3,9-dihdropunctatin                   |           |
|                          |                                       |                                                                       | 5,7-dihydroxy-3-(3'-hydroxy-4'-methoxybenzyl)-4-chromanone           |           |
|                          |                                       |                                                                       | 5,6-dihydroxy-3-(4-hydroxybenzyl)-7-methoxy-4-chromanone             |           |
|                          |                                       |                                                                       | 6-hydroxy-7- <i>O</i> -methyl-3,9-dihdropunctatin                    |           |
|                          |                                       |                                                                       | 7,4'-di- <i>O</i> -methyl-3'-hydroxy-3,9-dihdropunctatin             |           |
|                          |                                       |                                                                       | demethyleucomin                                                      |           |
|                          |                                       |                                                                       | punctatin                                                            |           |
|                          |                                       |                                                                       | 7- <i>O</i> -methyl-3'-hydroxypunctatin                              |           |

|                               |                                    |                                                                                                                                                                                                                |                                                                                                                             |      |
|-------------------------------|------------------------------------|----------------------------------------------------------------------------------------------------------------------------------------------------------------------------------------------------------------|-----------------------------------------------------------------------------------------------------------------------------|------|
| <i>Bellevaia flexuosa</i>     | CHCl <sub>3</sub> /bulb            | HPLC [MeOH–H <sub>2</sub> O (0.1% HCO <sub>2</sub> H) 50:50 to 100:0]                                                                                                                                          | 5-hydroxy-7,8-dimethoxychroman-4-one                                                                                        | [54] |
|                               |                                    |                                                                                                                                                                                                                | 7- <i>O</i> -methyl-8-demethoxy-3-hydroxy-3,9-dihdropunctatin                                                               |      |
|                               |                                    |                                                                                                                                                                                                                | isomuscomosin                                                                                                               |      |
|                               |                                    |                                                                                                                                                                                                                | 4',5,7-trihydroxyhomoisoflavanone                                                                                           |      |
|                               |                                    | HPLC [MeCN–H <sub>2</sub> O (0.1% HCO <sub>2</sub> H) 40:60 to 50:50]                                                                                                                                          | 3',4',5,7-tetrahydroxyhomoisoflavanone                                                                                      |      |
|                               |                                    |                                                                                                                                                                                                                | 4',5,7-trihydroxyhomoisoflavanone                                                                                           |      |
|                               |                                    |                                                                                                                                                                                                                | isomuscomosin                                                                                                               |      |
|                               |                                    |                                                                                                                                                                                                                | 3-(4-hydroxybenzyl)-5-hydroxy-6,7,8-trimethoxychroman-4-one                                                                 |      |
|                               |                                    | HPLC [MeCN–H <sub>2</sub> O (0.1% HCO <sub>2</sub> H) 40:60 to 60:40]                                                                                                                                          | 7- <i>O</i> -methyl-8-demethoxy-3-hydroxy-3,9-dihdropunctatin                                                               |      |
|                               |                                    |                                                                                                                                                                                                                | 7,4'- <i>O</i> -dimethyl-8-demethoxy-3,3'-dihydroxy-3,9-dihdropunctatin                                                     |      |
|                               |                                    |                                                                                                                                                                                                                | 3'-hydroxy-3,9-dihydroeucomin                                                                                               |      |
|                               |                                    |                                                                                                                                                                                                                | 3,9-dihdropunctatin                                                                                                         |      |
|                               |                                    | HPLC [MeCN–H <sub>2</sub> O (0.1% HCO <sub>2</sub> H) 40:60 to 50:50] and [MeOH–H <sub>2</sub> O (0.1% HCO <sub>2</sub> H) 60:40 to 70:30]                                                                     | 7- <i>O</i> -methyl-8-demethoxy-3'-hydroxy-3,9-dihdropunctatin                                                              |      |
|                               |                                    |                                                                                                                                                                                                                | 8- <i>O</i> -demethyl-7- <i>O</i> -methyl-3,9-dihdropunctatin                                                               |      |
|                               |                                    |                                                                                                                                                                                                                | 7- <i>O</i> -methyl-3'-hydroxypunctatin                                                                                     |      |
|                               |                                    |                                                                                                                                                                                                                | 7- <i>O</i> -methylpunctatin                                                                                                |      |
|                               |                                    | HPLC [MeCN–H <sub>2</sub> O (0.1% HCO <sub>2</sub> H) 30:70 to 40:60]<br>HPLC [MeCN–H <sub>2</sub> O (0.1% HCO <sub>2</sub> H) 28:72]<br>HPLC [MeOH–H <sub>2</sub> O (0.1% HCO <sub>2</sub> H) 50:50 to 60:40] | 7,4'-di- <i>O</i> -methyl-3'-hydroxy-3,9-dihdropunctatin                                                                    |      |
|                               |                                    |                                                                                                                                                                                                                | 7- <i>O</i> -methyl-3,9-dihdropunctatin                                                                                     |      |
|                               |                                    |                                                                                                                                                                                                                | 6-hydroxy-8-demethoxy-4'- <i>O</i> -methyl-3,9-dihdropunctatin                                                              |      |
|                               |                                    |                                                                                                                                                                                                                | 6-hydroxy-7- <i>O</i> -methyl-3,9-dihdropunctatin                                                                           |      |
|                               |                                    |                                                                                                                                                                                                                | 7- <i>O</i> -methyl-3-hydroxy-3,9-dihdropunctatin                                                                           |      |
|                               |                                    |                                                                                                                                                                                                                | 5-hydroxy-7,8-dimethoxychroman-4-one                                                                                        |      |
| <i>Bellevaia saviczii</i>     | CH <sub>2</sub> Cl <sub>2</sub> /R | MPLC [MeOH–H <sub>2</sub> O 20:80 to 100:0]                                                                                                                                                                    | dracol                                                                                                                      | [55] |
| <i>Bessera elegans</i>        | MeOH/bulb                          | CC [CHCl <sub>3</sub> –MeOH–H <sub>2</sub> O 100:10:1], RP-CC [MeOH–H <sub>2</sub> O 2:1]                                                                                                                      | (3 <i>R</i> )-5,7-dihydroxy-6-methyl-3-(3'-hydroxy-4'-methoxybenzyl)chroman-4-one                                           | [80] |
|                               |                                    |                                                                                                                                                                                                                | (3 <i>R</i> )-5,7,3'-trihydroxy-4'-methoxy-6-methylspiro[2 <i>H</i> -1-benzopyran-7'-bicyclo[4.2.0]octa[1,3,5]-trien]-4-one |      |
| <i>Chlorophytum inornatum</i> | NHEX/R                             | SLH, RP-PTLC [MeOH–H <sub>2</sub> O 85:15]                                                                                                                                                                     | 3-(4'-methoxybenzyl)-7,8-methylenedioxy-chroman-4-one                                                                       | [81] |
| <i>Disporopsis aspera</i>     | EtOAc/rhizome                      | PTLC [NHEX–EtOAc 4:6]                                                                                                                                                                                          | 3-(2',4'-dihydroxybenzyl)-5,7-dihydroxy-chroman-4-one (syn. <i>disporopsin</i> )                                            | [82] |

|                                 |                                         |                                                                                                                              |                                                                                                                             |      |
|---------------------------------|-----------------------------------------|------------------------------------------------------------------------------------------------------------------------------|-----------------------------------------------------------------------------------------------------------------------------|------|
|                                 |                                         | CC [NHEX–EtOAc 1:0, 9:1, 8:2, 7:3, 6:4, 1:1], PTLC [NHEX–EtOAc 6:4]                                                          | 3-(4'-hydroxy-benzyl)-5,7-dihydroxy-6-methyl-8-methoxy-chroman-4-one                                                        |      |
|                                 |                                         | CC [NHEX–EtOAc 1:0, 9:1, 8:2, 7:3, 6:4, 1:1], PTLC [NHEX–EtOAc 7:3]                                                          | 3-(4'-hydroxy-benzyl)-5,7-dihydroxy-6-methylchroman-4-one<br>3-(4'-hydroxy-benzyl)-5,7-dihydroxy-6,8-dimethyl-chroman-4-one |      |
| <i>Dracaena cambodiana</i>      | EtOAc/St                                | CC [CHCl <sub>3</sub> –MeOH 50:1 to 30:1], SLH [EtOH]                                                                        | cambodianol                                                                                                                 | [56] |
| <i>Dracaena cinnabari</i>       | CHCl <sub>3</sub> /resin                | CC [NHEX–EtOAc], HPLC [MeOH–H <sub>2</sub> O (0.2% HOAc)]                                                                    | 7-hydroxy-3-(3-hydroxy-4-methoxybenzyl)chroman                                                                              | [57] |
|                                 |                                         | CC [NHEX–EtOAc]                                                                                                              | 7-hydroxy-3-(4-hydroxybenzyl)-8-methoxychroman                                                                              |      |
|                                 |                                         |                                                                                                                              | 3-(4-hydroxybenzyl)-7,8-methylenedioxychroman                                                                               |      |
|                                 |                                         |                                                                                                                              | 7-hydroxy-3-(4-hydroxybenzyl)chroman                                                                                        |      |
| <i>Dracaena cochinchinensis</i> | EtOAc/resin<br>(Chinese dragon's blood) | SLH [MeOH], HPLC [MeCN–H <sub>2</sub> O 35:65]                                                                               | (7 <i>R</i> ,12 <i>bR</i> )-7,10-dihydroxy-4,11-dimethoxydracaenone                                                         | [59] |
|                                 |                                         |                                                                                                                              | 10-hydroxy-11-methoxydracaenone                                                                                             |      |
|                                 |                                         |                                                                                                                              | (7 <i>S</i> ,12 <i>bS</i> )-11-hydroxy-1,10-dimethoxydracaenone                                                             |      |
|                                 |                                         |                                                                                                                              | (7 <i>S</i> ,12 <i>bS</i> )-10,11-dihydroxy-1-methoxydracaenone                                                             |      |
|                                 |                                         | SLH [MeOH], HPLC [MeOH–H <sub>2</sub> O 58:42]                                                                               | (3 <i>S</i> )-3,7,4'-trihydroxy-5-methoxyhomoisoflavanonol                                                                  | [60] |
|                                 |                                         |                                                                                                                              | (3 <i>R</i> )-7,4'-dihydroxy-6-methoxyhomoisoflavane                                                                        |      |
|                                 |                                         | CC [PE–EtOAc 5:1 to 0:1]                                                                                                     | 7,4'-dihydroxyhomoisoflavanone                                                                                              |      |
|                                 |                                         |                                                                                                                              | loureiriol                                                                                                                  |      |
|                                 |                                         | HPLC [MeOH–H <sub>2</sub> O 30:70]                                                                                           | 7,4'-dihydroxy-5-methoxyhomoisoflavanone                                                                                    |      |
|                                 |                                         |                                                                                                                              | 5,4'-dihydroxy-7- methoxyhomoisoflavone                                                                                     |      |
|                                 |                                         | RP-CC [MeOH–H <sub>2</sub> O 4:6 to 1:0], CC [CHCl <sub>3</sub> –MeOH 20:1 to 5:1], RP-CC [MeOH–H <sub>2</sub> O 1:1 to 1:0] | dracaconolide A                                                                                                             |      |
|                                 |                                         |                                                                                                                              | (3 <i>R</i> )-6,4'-dihydroxy-8-methoxyhomoisoflavan                                                                         |      |
|                                 | MeOH/resin                              | SLH [MeOH], HPLC [MeCN–H <sub>2</sub> O 44:56 to 47:53, MeOH–H <sub>2</sub> O 65:35 to 67:33]                                | dracaconolide B                                                                                                             | [61] |
|                                 |                                         |                                                                                                                              | (3 <i>R</i> )-7,4'-dihydroxy-8-methoxyhomoisoflavane                                                                        |      |
|                                 |                                         |                                                                                                                              | (3 <i>R</i> )-7-hydroxy-3-(4-hydroxybenzyl)chromane                                                                         |      |
|                                 |                                         |                                                                                                                              | (3 <i>R</i> )-7,4'-dihydroxy-5-methoxy-homoisoflavane                                                                       |      |
|                                 |                                         | HPLC [MeCN–H <sub>2</sub> O 50:50]                                                                                           | biflavocochin A                                                                                                             |      |
|                                 |                                         |                                                                                                                              | biflavocochin G                                                                                                             |      |
|                                 | EtOAc/St                                | CC, SLH                                                                                                                      | biflavocochin E                                                                                                             | [62] |
|                                 |                                         |                                                                                                                              | biflavocochin B                                                                                                             |      |
|                                 |                                         |                                                                                                                              | biflavocochin D                                                                                                             |      |
|                                 |                                         |                                                                                                                              | biflavocochin F                                                                                                             |      |
|                                 |                                         |                                                                                                                              | 10,11-dihydroxydracaenone C                                                                                                 |      |

|                           |                                       |                                                                                                                                                                            |                                                                                                                                       |      |
|---------------------------|---------------------------------------|----------------------------------------------------------------------------------------------------------------------------------------------------------------------------|---------------------------------------------------------------------------------------------------------------------------------------|------|
|                           |                                       |                                                                                                                                                                            | 7,4'-dihydrohomoisoflavanone                                                                                                          |      |
|                           |                                       |                                                                                                                                                                            | 7,4'-homoisoflavane                                                                                                                   |      |
| <i>Dracaena draco</i>     | Me <sub>2</sub> CO/resin              | CC [CH <sub>2</sub> Cl <sub>2</sub> –MeOH 99:1, 95:5, 90:10, 85:5, 80:20], PTLC [NHEX–CHCl <sub>3</sub> ]                                                                  | 7-hydroxy-3-(4-hydroxybenzyl)chromane                                                                                                 | [64] |
|                           |                                       |                                                                                                                                                                            | 5,7-dihydroxy-6-methoxy-3-(4-hydroxy-benzyl)-chroman-4-one                                                                            |      |
|                           |                                       | CC [CH <sub>2</sub> Cl <sub>2</sub> –MeOH 99:1, 95:5, 90:10, 85:5, 80:20], FC [NHEX–EtOAc 1:0, 9:1, 8:2, 7:3, 6:4, 1:1], PTLC [NHEX–EtOAc 8:2; NHEX–CHCl <sub>3</sub> 3:1] | 7-hydroxy-3-(4-hydroxybenzyl)-8-methylchromane                                                                                        |      |
|                           |                                       |                                                                                                                                                                            | 5,7-dihydroxy-6,8-dimethyl-3-(4-hydroxy-benzyl)-chromane-4-one                                                                        |      |
|                           |                                       |                                                                                                                                                                            | 7-hydroxy-3-(4-hydroxybenzyl)-8-methoxylchromane                                                                                      |      |
|                           |                                       |                                                                                                                                                                            | 7-hydroxy-3-(4-hydroxybenzyl)-5-methoxychromane                                                                                       |      |
|                           |                                       | CC [CH <sub>2</sub> Cl <sub>2</sub> –MeOH 99:1, 95:5, 90:10, 85:5, 80:20], PTLC [CHCl <sub>3</sub> –EtOAc 9:1]                                                             | 7-hydroxy-3-(4-hydroxybenzyl)-chroman-4-one                                                                                           |      |
|                           |                                       |                                                                                                                                                                            | 5,7-dihydroxy-3-(4-hydroxy-benzyl)-chroman-4-one                                                                                      |      |
|                           |                                       | CC [CH <sub>2</sub> Cl <sub>2</sub> –MeOH 99:1, 95:5, 90:10, 85:5, 80:20], CC [NHEX–EtOAc]                                                                                 | 5,7-dihydroxy-6-methyl-3-(4-hydroxy-benzyl)-chromane-4-one                                                                            |      |
|                           |                                       |                                                                                                                                                                            | 5,8-dihydroxy-7-methoxy-3-(4-hydroxy-benzyl)-chroman-4-one                                                                            |      |
|                           | EtOH/L                                | SLH [NHEX–CH <sub>2</sub> Cl <sub>2</sub> –MeOH 2:1:1] and PTLC [NHEX–EtOAc 85:15]                                                                                         | (3 <i>R</i> )-2,3-dihydro-3,5-dihydroxy-7-methoxy-3-[(4-methoxyphenyl)-methyl]-8-methyl-4 <i>H</i> -[1]benzopyran-4-one (syn. dracol) | [63] |
|                           |                                       | SLH [NHEX–CH <sub>2</sub> Cl <sub>2</sub> –MeOH 2:1:1] and PTLC [CH <sub>2</sub> Cl <sub>2</sub> –Me <sub>2</sub> CO 15:1, toluene– <i>i</i> -PrOH 10:1]                   | 5,7-dihydroxy-3-(4-hydroxybenzyl)chromone                                                                                             |      |
| <i>Dracaena loureiri</i>  | n.d/St                                | CC, PTLC                                                                                                                                                                   | (7 <i>S</i> , 12 <i>bR</i> )-10-hydroxy-11-methoxy-dracaenone                                                                         | [65] |
|                           |                                       |                                                                                                                                                                            | (7 <i>R</i> , 12 <i>bR</i> )-7,10-dihydroxy-11-methoxy-dracaenone                                                                     |      |
|                           |                                       |                                                                                                                                                                            | (3 <i>S</i> )-7,4-dihydroxy-3-(4-hydroxybenzyl)chromane                                                                               |      |
|                           |                                       |                                                                                                                                                                            | (3 <i>R</i> )-eucomol                                                                                                                 |      |
| <i>Drimia delagoensis</i> | CH <sub>2</sub> Cl <sub>2</sub> /bulb | CC [EtOAc–CHCl <sub>3</sub> 2:10]                                                                                                                                          | 5,7-dihydroxy-(4-hydroxy-3-methoxybenzyl)chroman-4-one                                                                                | [83] |
| <i>Drimiopsis barteri</i> | MeOH–CHCl <sub>3</sub> /L, bulb       | CC [CHCl <sub>3</sub> –PE 7:3], PTLC [CHCl <sub>3</sub> –PE–MeOH 7:2:0.5]                                                                                                  | 5,6,7-trihydroxy-3-(4-hydroxybenzyl)chroman-4-one                                                                                     | [84] |
| <i>Eucomis autumnalis</i> | <i>n</i> -BuOH/bulb                   | CC [NHEX–CH <sub>2</sub> Cl <sub>2</sub> 50:50 to 0:100], CC [CH <sub>2</sub> Cl <sub>2</sub> –EtOAc 50:50], CC [CH <sub>2</sub> Cl <sub>2</sub> –MeOH 50:50]              | 3 <i>R</i> -(4'-hydroxybenzyl)-6,8-dihydroxy-5,7-dimethoxy-4-chromanone                                                               | [67] |
| <i>Eucomis comosa</i>     | EtOAc/bulb                            | CC [EtOAc (0 to 100%)–NHEX]                                                                                                                                                | 7-hydroxy-5-methoxy-3-(4'-hydroxybenzyl)-4-chromanone                                                                                 | [66] |
|                           |                                       |                                                                                                                                                                            | 5,7-dihydroxy-8-methoxy-3-(4'-hydroxybenzyl)-4-chromanone (syn. 3,9-dihdropunctatin)                                                  |      |
|                           |                                       |                                                                                                                                                                            | punctatin                                                                                                                             |      |
|                           |                                       |                                                                                                                                                                            | ( <i>Z</i> )-eucomin                                                                                                                  |      |
|                           |                                       |                                                                                                                                                                            | ( <i>E</i> )-eucomin                                                                                                                  |      |

|                                                        |                                       |                                                 |                                                                                                  |      |
|--------------------------------------------------------|---------------------------------------|-------------------------------------------------|--------------------------------------------------------------------------------------------------|------|
| <i>Eucomis montana</i>                                 | CH <sub>2</sub> Cl <sub>2</sub> /bulb | CC [CH <sub>2</sub> Cl <sub>2</sub> ]           | 3,9-dihydroeucomin                                                                               | [68] |
|                                                        |                                       |                                                 | 7- <i>O</i> -methyleucomol                                                                       |      |
|                                                        |                                       | CC [EtOAc–CH <sub>2</sub> Cl <sub>2</sub> 1:9]  | eucomol                                                                                          |      |
|                                                        |                                       | CC [EtOAc–CH <sub>2</sub> Cl <sub>2</sub> 3:17] | 5,6-dimethoxy-7-hydroxy-3-(4'-hydroxybenzyl)-4-chromanone                                        |      |
|                                                        | EtOAc/bulb                            | CC [CH <sub>2</sub> Cl <sub>2</sub> ]           | 4'-demethyl-5- <i>O</i> -methyl-3,9-dihydroeucomin                                               |      |
|                                                        |                                       |                                                 | eucomin                                                                                          |      |
|                                                        |                                       | CC [EtOAc–CH <sub>2</sub> Cl <sub>2</sub> 1:9]  | 8- <i>O</i> -demethyl-7- <i>O</i> -methyl-3,9-dihdropunctatin                                    |      |
|                                                        |                                       | CC [EtOAc–CH <sub>2</sub> Cl <sub>2</sub> 1:4]  | 7- <i>O</i> -methyl-3,9-dihdropunctatin                                                          |      |
|                                                        | MeOH/bulb                             |                                                 | 3',5,7-trihydroxy-4'-methoxyspiro[2H-1-benzopyran-3(4H),7'-bicyclo[4.2.0]octa-1,3,5-trien]-4-one |      |
|                                                        |                                       | CC [EtOAc–CH <sub>2</sub> Cl <sub>2</sub> 2:3]  | 4'-demethyl-3,9-dihydroeucomin                                                                   |      |
|                                                        |                                       |                                                 | 4'- <i>O</i> -demethyleucomol                                                                    |      |
|                                                        |                                       |                                                 |                                                                                                  |      |
| <i>Eucomis pallidiflora</i> subsp. <i>pole-evansii</i> | CH <sub>2</sub> Cl <sub>2</sub> /bulb | CC [CH <sub>2</sub> Cl <sub>2</sub> –MeOH 98:2] | 8-methoxy-5,6,7-trihydroxy-3-(4'-hydroxybenzylidene)-4-chromanone                                | [66] |
| <i>Eucomis schijffii</i>                               | CH <sub>2</sub> Cl <sub>2</sub> /bulb | CC [CH <sub>2</sub> Cl <sub>2</sub> ]           | scillascillin                                                                                    | [66] |
| <i>Eucomis vandermerwei</i>                            | CH <sub>2</sub> Cl <sub>2</sub> /bulb | CC [CH <sub>2</sub> Cl <sub>2</sub> ]           | ( <i>E</i> )-5,7-dihydroxy-3-(4'-methoxybenzylidene)-4-chromanone                                | [69] |
|                                                        |                                       |                                                 | ( <i>R</i> )-5,7-dihydroxy-3-(4'-methoxybenzyl)-4-chromanone                                     |      |
|                                                        | MeOH/bulb                             | CC [CH <sub>2</sub> Cl <sub>2</sub> –MeOH 98:2] | 3,5,7-trihydroxy-3-(4'-methoxybenzyl)-4-chromanone                                               |      |
|                                                        |                                       | CC [CH <sub>2</sub> Cl <sub>2</sub> –MeOH 95:5] | ( <i>R</i> )-5,6-dimethoxy-7-hydroxy-3-(4'-hydroxybenzyl)-4-chromanone                           |      |
| <i>Eucomis zambesiaca</i>                              | MeOH/bulb                             | CC [CH <sub>2</sub> Cl <sub>2</sub> –MeOH 98:2] | ( <i>R</i> )-5,7-dihydroxy-8-methoxy-3-(4'-hydroxybenzyl)-4-chromanone                           | [69] |
|                                                        |                                       |                                                 | ( <i>R</i> )-5,7-dihydroxy-6-methoxy-3-(4'-hydroxybenzyl)-4-chromanone                           |      |
|                                                        |                                       |                                                 | ( <i>R</i> )-5,7-dihydroxy-8-methoxy-3-(4'-methoxybenzyl)-4-chromanone                           |      |
|                                                        |                                       | CC [CH <sub>2</sub> Cl <sub>2</sub> –MeOH 99:1] | ( <i>E</i> )-5,7-dihydroxy-8-methoxy-3-(4'-methoxybenzylidene)-4-chromanone                      |      |
|                                                        |                                       |                                                 | ( <i>E</i> )-5,7-dihydroxy-3-(4'-methoxybenzylidene)-4-chromanone                                |      |
|                                                        |                                       |                                                 |                                                                                                  |      |
| <i>Herreria montevidensis</i>                          | CHCl <sub>3</sub> /R                  | SLH [MeOH] and HPLC [MeOH–H <sub>2</sub> O 5:5] | (3 <i>R</i> )-7-hydroxy-8-methoxy-3-(4-hydroxybenzyl)chroman                                     | [85] |
|                                                        |                                       |                                                 | (3 <i>R</i> )-7-hydroxy-8-methoxy-3-(4-hydroxybenzyl)chroman                                     |      |
|                                                        |                                       | HPLC [MeOH–H <sub>2</sub> O 5:5]                | (3 <i>R</i> )-7-methoxy-3-(4-hydroxybenzyl)chroman                                               |      |
|                                                        |                                       |                                                 | (3 <i>R</i> )-7-hydroxy-5-methoxy-6-methyl-3-(4-hydroxybenzyl)chroman                            |      |

|                                |                                            |                                                                                                                                              |                                  |                                                                                                                               |      |
|--------------------------------|--------------------------------------------|----------------------------------------------------------------------------------------------------------------------------------------------|----------------------------------|-------------------------------------------------------------------------------------------------------------------------------|------|
|                                |                                            |                                                                                                                                              | HPLC [MeOH–H <sub>2</sub> O 7:3] | (3R)-7-hydroxy-5-methoxy-6-methyl-3-(4-hydroxybenzyl)chroman                                                                  |      |
|                                |                                            |                                                                                                                                              |                                  | (3R)-7-methoxy-3-(4-hydroxybenzyl)chroman                                                                                     |      |
|                                |                                            |                                                                                                                                              |                                  | (3R)-5,7-dimethoxy-6-methyl-3-(4-hydroxybenzyl)chroman                                                                        |      |
|                                |                                            |                                                                                                                                              |                                  | (3R)-5,7-dimethoxy-6-methyl-3-(4-hydroxybenzyl)chroman                                                                        |      |
|                                |                                            |                                                                                                                                              |                                  | 7-hydroxy-8-methoxy-3-(4-hydroxybenzyl)-3-chromen                                                                             |      |
| <i>Ledebouria</i>              | MeOH/R                                     | HPLC [MeOH–H <sub>2</sub> O 7:3]                                                                                                             |                                  | 7-hydroxy-8-methoxy-3-(4-hydroxybenzyl)-3-chromen                                                                             |      |
|                                |                                            |                                                                                                                                              |                                  | 7-hydroxy-8-methoxy-3-(4-hydroxybenzyl)-3-chromen                                                                             |      |
|                                |                                            |                                                                                                                                              |                                  | 5-hydroxy-7-methoxy-3-(4'-hydroxybenzyl)-4-chromanone                                                                         |      |
|                                |                                            |                                                                                                                                              |                                  | 5-hydroxy-6,7-dimethoxy-3-(4'-hydroxybenzyl)-4-chromanone                                                                     |      |
|                                |                                            |                                                                                                                                              |                                  | 5,7,8-trimethoxy-3-(4'-hydroxybenzyl)-4-chromanone                                                                            |      |
| <i>Ledebouria graminifolia</i> | CH <sub>2</sub> Cl <sub>2</sub> –MeOH/bulb | SLH, PTLC [CHCl <sub>3</sub> –MeOH 95:5]                                                                                                     |                                  | 5-hydroxy-3',4',7-trimethoxyspiro{2H-1-benzopyran-7'-bicyclo[4.2.0]octa[1,3,5]-trien}-4-one                                   | [70] |
|                                |                                            |                                                                                                                                              |                                  | 5,7-dihydroxy-3',4'-dimethoxyspiro{2H-1-benzopyran-7'-bicyclo[4.2.0]octa[1,3,5]-trien}-4-one                                  |      |
|                                |                                            |                                                                                                                                              |                                  | 2-hydroxy-7-O-methylscillascillin                                                                                             |      |
|                                |                                            |                                                                                                                                              |                                  | (R)-5,7-dihydroxy-3-(4'-hydroxybenzyl)chroman-4-one                                                                           |      |
|                                |                                            |                                                                                                                                              |                                  | (R)-5,7-dihydroxy-3-(4'-methoxybenzyl)chroman-4-one                                                                           |      |
| <i>Ledebouria ovatifolia</i>   | CH <sub>2</sub> Cl <sub>2</sub> /bulb      | CC [NHEX–CH <sub>2</sub> Cl <sub>2</sub> ], CC [CH <sub>2</sub> Cl <sub>2</sub> –MeOH]                                                       |                                  | (R)-7-hydroxy-3-(4'-hydroxybenzyl)-5-methoxychroman-4-one                                                                     | [71] |
|                                |                                            |                                                                                                                                              |                                  | (R)-3-(3',4'-dihydroxybenzyl)-7-hydroxy-5-methoxychroman-4-one                                                                |      |
|                                |                                            |                                                                                                                                              |                                  | (E)-3-(3',4'-dihydroxybenzylidene)-7-hydroxy-5-methoxychroman-4-one                                                           |      |
|                                |                                            |                                                                                                                                              |                                  | (E)-3-(3',4'-dihydroxybenzylidene)-5,7-dihydroxychroman-4-one (syn. ovatifolionone)                                           |      |
|                                |                                            |                                                                                                                                              |                                  | (R)-2',5-dihydroxy-3',4',7-trimethoxyspiro{2H-1-benzopyran-3-(4H)-9-bicyclo[4.2.0]octa[1,3,5]triene}-4-one (syn. socialinone) |      |
| <i>Ledebouria socialis</i>     | CH <sub>2</sub> Cl <sub>2</sub> /bulb      | CC [NHEX–CH <sub>2</sub> Cl <sub>2</sub> ], CC [CH <sub>2</sub> Cl <sub>2</sub> –MeOH], PTLC [EtOAc–CH <sub>2</sub> Cl <sub>2</sub> 10:90]   |                                  | (–)-liriopein A                                                                                                               | [86] |
|                                |                                            |                                                                                                                                              |                                  | (–)-liriopein B                                                                                                               |      |
| <i>Liriope platyphylla</i>     | hydro-ethanolic/R                          | CC [CH <sub>2</sub> Cl <sub>2</sub> –MeOH 98:2], SLH [CH <sub>2</sub> Cl <sub>2</sub> –EtOAc–MeOH 1:1:6], HPLC [MeOH–H <sub>2</sub> O 65:35] |                                  | (3R)-3-(4'-hydroxybenzyl)-5,7-dihydroxylchroman-4-one                                                                         |      |
|                                |                                            | CC [CH <sub>2</sub> Cl <sub>2</sub> –MeOH 96.5:3.5], RP-CC [MeOH–H <sub>2</sub> O 75:25]                                                     |                                  | 3-(4'-hydroxybenzylidene)-5,7-dihydroxychroman-4-one                                                                          |      |
|                                |                                            | SLH [CH <sub>2</sub> Cl <sub>2</sub> –EtOAc–MeOH 1:1:6], RP-CC [MeOH–H <sub>2</sub> O 65:35]                                                 |                                  |                                                                                                                               |      |

|                             |                                       |                                                                                              |                                                                                  |      |
|-----------------------------|---------------------------------------|----------------------------------------------------------------------------------------------|----------------------------------------------------------------------------------|------|
|                             |                                       | SLH [CH <sub>2</sub> Cl <sub>2</sub> –EtOAc–MeOH 1:1:6], HPLC [MeOH–H <sub>2</sub> O 75:25]  | (3 <i>R</i> )-3-(4'-hydroxybenzyl)-5,7-dihydroxy-6-methyl-chroman-4-one          |      |
|                             |                                       | RP-CC [MeOH–H <sub>2</sub> O 60:40], HPLC [MeOH–H <sub>2</sub> O 50:50]                      | (3 <i>R</i> )-3-(2',4'-dihydroxybenzyl)-5,7-dihydroxychroman-4-one               |      |
|                             |                                       |                                                                                              | (3 <i>R</i> )-3-(2',4'-dihydroxybenzyl)-5,7-dihydroxy-6-methyl-chroman-4-one     |      |
|                             |                                       | RP-CC [MeOH–H <sub>2</sub> O 75:25]                                                          | (3 <i>R</i> )-3-(4'-hydroxybenzyl)-3,5-dihydroxy-7-methoxy-6-methylchroman-4-one |      |
|                             | EtOAc/AP                              | CC [CH <sub>2</sub> Cl <sub>2</sub> –MeOH 20:1 to 15:1], HPLC [MeCN–H <sub>2</sub> O 45:55]  | 3-(2',4'-dihydroxybenzyl)-5,7-dihydroxy-6-methylchroman-4-one                    | [87] |
|                             |                                       | HPLC [MeOH–H <sub>2</sub> O 60:40]                                                           | 3-(2',4'-dihydroxy-benzyl)-5,7-dihydroxy-6-methylchroman-4-one                   |      |
| <i>Massonia bifolia</i>     | EtOH/bulb                             | CC [CH <sub>2</sub> Cl <sub>2</sub> –EtOAc], SLH [CH <sub>2</sub> Cl <sub>2</sub> –MeOH 1:1] | ( <i>R</i> )-(4'-hydroxy)-5-hydroxy-7-methoxy-4-chromanone                       | [72] |
|                             |                                       |                                                                                              | ( <i>R</i> )-(4'-hydroxy)-5,7-dihydroxy-4-chromanone                             |      |
|                             |                                       |                                                                                              | ( <i>E</i> )-3-benzylidene-(3',4'-dihydroxy)-5-hydroxy-7-methoxy-4-chromanone    |      |
|                             |                                       |                                                                                              | ( <i>R</i> )-(3'-hydroxy-4'-methoxy)-5,7-dihydroxy-4-chromanone                  |      |
|                             |                                       |                                                                                              | ( <i>E</i> )-3-(3',4'-dihydroxybenzylidene)-5-hydroxy-7-methoxy-4-chromanone     |      |
| <i>Massonia pustulata</i>   | CH <sub>2</sub> Cl <sub>2</sub> /bulb | CC [CH <sub>2</sub> Cl <sub>2</sub> –EtOAc], SLH [CH <sub>2</sub> Cl <sub>2</sub> –MeOH 1:1] | ( <i>R</i> )-5-hydroxy-3-(4-hydroxybenzyl)-7-methoxy-4-chromanone                | [73] |
|                             |                                       |                                                                                              | 5-hydroxy-3-(4-hydroxybenzyl)-7-methoxy-4-chromone                               |      |
| <i>Ophiopogon japonicus</i> | ether/subterranean                    | CC [Bz], recryst.                                                                            | methylophiopogonone A                                                            | [22] |
|                             |                                       |                                                                                              | methylophiopogonanone A                                                          |      |
|                             |                                       |                                                                                              | 5-hydroxy-7, 8-dimethoxy-6-methyl-3-(3', 4'-dihydroxybenzyl)chroman-4-one        |      |
|                             |                                       | CC [NHEX–Me <sub>2</sub> CO 8:2], recryst.                                                   | ophiopogonanone A                                                                |      |
|                             |                                       |                                                                                              | ophiopogonone A                                                                  |      |
|                             |                                       | HPLC [MeCN–H <sub>2</sub> O 1:1]                                                             | desmethylisophiopogonone B                                                       |      |
|                             |                                       |                                                                                              | 5,7,2'-trihydroxy-6-methyl-3-(3', 4'-methylenedioxybenzyl)chromone               |      |
|                             |                                       |                                                                                              | 5,7,2'-trihydroxy-8-methyl-3-(3', 4'-methylenedioxybenzyl)chromone               |      |
|                             | EtOH–EtOAc/tuber                      | recryst. [CHCl <sub>3</sub> –MeOH]                                                           | ophiopogonanone C                                                                | [21] |
|                             |                                       | SLH [MeOH–H <sub>2</sub> O 4:1]                                                              | ophiopogonanone D                                                                |      |
|                             |                                       |                                                                                              | ophiopogonone C                                                                  |      |

|                          |                                                                                                                                                                                                                                                                                                                                                                                                                                                                                                                                                                                                              |                                                                               |      |
|--------------------------|--------------------------------------------------------------------------------------------------------------------------------------------------------------------------------------------------------------------------------------------------------------------------------------------------------------------------------------------------------------------------------------------------------------------------------------------------------------------------------------------------------------------------------------------------------------------------------------------------------------|-------------------------------------------------------------------------------|------|
|                          | PTLC [CHCl <sub>3</sub> –EtOAc 20:1]                                                                                                                                                                                                                                                                                                                                                                                                                                                                                                                                                                         | ophiopogonanone E                                                             |      |
|                          |                                                                                                                                                                                                                                                                                                                                                                                                                                                                                                                                                                                                              | ophiopogonanone F                                                             |      |
|                          |                                                                                                                                                                                                                                                                                                                                                                                                                                                                                                                                                                                                              | 5,7,2'-trihydroxy-6-methyl-3-(3',4'-methylenedioxybenzyl)chromone             |      |
|                          |                                                                                                                                                                                                                                                                                                                                                                                                                                                                                                                                                                                                              | 2'-hydroxymethylphiopogonone A                                                |      |
| CHCl <sub>3</sub> /tuber | CC [NHEX–CHCl <sub>3</sub> ]                                                                                                                                                                                                                                                                                                                                                                                                                                                                                                                                                                                 | 6-aldehydoisophiopogonone A                                                   | [24] |
|                          | RP-CC [Me <sub>2</sub> CO–H <sub>2</sub> O 3:2]                                                                                                                                                                                                                                                                                                                                                                                                                                                                                                                                                              | homoisopogon A                                                                |      |
|                          | RP-CC [Me <sub>2</sub> CO–H <sub>2</sub> O 1:1]                                                                                                                                                                                                                                                                                                                                                                                                                                                                                                                                                              | homoisopogon C                                                                |      |
|                          |                                                                                                                                                                                                                                                                                                                                                                                                                                                                                                                                                                                                              | homoisopogon B                                                                |      |
| EtOAc/R                  | HPLC [MeOH–H <sub>2</sub> O 7:3]                                                                                                                                                                                                                                                                                                                                                                                                                                                                                                                                                                             | homoisopogon D                                                                | [25] |
|                          |                                                                                                                                                                                                                                                                                                                                                                                                                                                                                                                                                                                                              | ophiopogonone D                                                               |      |
| EtOAc/tuberous R         | FC [NHEX–CHCl <sub>3</sub> 7:3, CHCl <sub>3</sub> ]<br>FC [CHCl <sub>3</sub> –MeOH 97:3], PTLC [CHCl <sub>3</sub> –MeOH 95:5]<br>FC [CHCl <sub>3</sub> –MeOH 95:5]<br>FC [CHCl <sub>3</sub> –MeOH 95:5], PTLC [CHCl <sub>3</sub> –MeOH 93:7], SLH [EtOH]<br>CC [CHCl <sub>3</sub> ], PTLC [CHCl <sub>3</sub> –MeOH 93:7, NHEX–EtOAc 1:1]<br>CC [CHCl <sub>3</sub> ], SLH [EtOH]<br>CC [NHEX–CHCl <sub>3</sub> 7:3], PTLC [CHCl <sub>3</sub> ]<br>CC [CHCl <sub>3</sub> ], PTLC [CHCl <sub>3</sub> –MeOH 93:7], RP-CC [MeOH–H <sub>2</sub> O 8:2]<br>RP-CC [MeOH–H <sub>2</sub> O 8:2], PTLC [NHEX–EtOAc 1:1] | ophiopogonanone G                                                             | [26] |
|                          |                                                                                                                                                                                                                                                                                                                                                                                                                                                                                                                                                                                                              | 5,7-dihydroxy-8-methoxy-6-methyl-3-(2'-hydroxy-4'-methoxybenzyl)chroman-4-one |      |
|                          |                                                                                                                                                                                                                                                                                                                                                                                                                                                                                                                                                                                                              | 7-hydroxy-5,8-dimethoxy-6-methyl-3-(2'-hydroxy-4'-methoxybenzyl)chroman-4-one |      |
|                          |                                                                                                                                                                                                                                                                                                                                                                                                                                                                                                                                                                                                              | 5,7-dihydroxy-6,8-dimethyl-3-(4'-hydroxy-3'-methoxybenzyl)chroman-4-one       |      |
|                          |                                                                                                                                                                                                                                                                                                                                                                                                                                                                                                                                                                                                              | 2,5,7-trihydroxy-6,8-dimethyl-3-(3',4'-methylenedioxybenzyl)-chroman-4-one    |      |
|                          |                                                                                                                                                                                                                                                                                                                                                                                                                                                                                                                                                                                                              | 2,5,7-trihydroxy-6,8-dimethyl-3-(4'-methoxybenzyl)chroman-4-one               |      |
|                          |                                                                                                                                                                                                                                                                                                                                                                                                                                                                                                                                                                                                              | 5,7-trihydroxy-6,8-dimethyl-3-(2'-hydroxy-3',4'-methylenedioxybenzyl)chromone |      |
|                          |                                                                                                                                                                                                                                                                                                                                                                                                                                                                                                                                                                                                              | methylophiopogonone A                                                         |      |
|                          |                                                                                                                                                                                                                                                                                                                                                                                                                                                                                                                                                                                                              | ophiopogonanone A                                                             |      |
|                          |                                                                                                                                                                                                                                                                                                                                                                                                                                                                                                                                                                                                              | ophiopogonanone B                                                             |      |
|                          |                                                                                                                                                                                                                                                                                                                                                                                                                                                                                                                                                                                                              | methylophiopogonone A                                                         |      |
|                          |                                                                                                                                                                                                                                                                                                                                                                                                                                                                                                                                                                                                              | 6-formyl-isophiopogonone A                                                    |      |
| EtOAc/R                  | HPLC [MeCN–H <sub>2</sub> O (0.1% HCO <sub>2</sub> H) 75:25]                                                                                                                                                                                                                                                                                                                                                                                                                                                                                                                                                 | 5-hydroxy-7,8-dimethoxy-6-methyl-3-(3',4'-dihydroxybenzyl)chroman-4-one       | [10] |
|                          | HPLC [MeOH–H <sub>2</sub> O (0.1% HCO <sub>2</sub> H) 80:20]                                                                                                                                                                                                                                                                                                                                                                                                                                                                                                                                                 | 5,7-dihydroxy-6,8-dimethyl-3-(4'-hydroxy-3',8'-dimethoxybenzyl)chroman-4-one  |      |
|                          |                                                                                                                                                                                                                                                                                                                                                                                                                                                                                                                                                                                                              | ophiopogonone G                                                               |      |
|                          |                                                                                                                                                                                                                                                                                                                                                                                                                                                                                                                                                                                                              | ophiopogonide A                                                               |      |



|                                     |                                                                                                                   |                                                                                                      |      |
|-------------------------------------|-------------------------------------------------------------------------------------------------------------------|------------------------------------------------------------------------------------------------------|------|
| hydro-ethanolic<br>(80%)/tuberous R | HPLC [MeOH–H <sub>2</sub> O 60:40 to 70:30]                                                                       | ophiopogonone E                                                                                      | [27] |
|                                     |                                                                                                                   | ophiopogonanone H                                                                                    |      |
|                                     |                                                                                                                   | 5,7,4'-trihydroxy-3'-methoxy-6,8-dimethyl homoisoflavanone                                           |      |
|                                     |                                                                                                                   | 5,7-dihydroxy-4'-methoxy-6-methyl homoisoflavanone                                                   |      |
|                                     |                                                                                                                   | methylophiopogonanone B                                                                              |      |
|                                     |                                                                                                                   | 5,7,2'-trihydroxy-4'-methoxy-6,8-dimethyl homoisoflavanone                                           |      |
|                                     |                                                                                                                   | ophiopogonanone A                                                                                    |      |
|                                     |                                                                                                                   | methylophiopogonanone A                                                                              |      |
|                                     |                                                                                                                   | 5,7,2'-trihydroxy-3',4'-methylenedioxy-6,8-dimethyl homoisoflavone                                   |      |
|                                     |                                                                                                                   | methylophiopogonone A                                                                                |      |
| MeOH/R                              | HSCCC [NH <sub>4</sub> EX–EtOAc–MeOH–MeCN–H <sub>2</sub> O 1.8:1.0:1.0:1.2:1.0]                                   | ophiopogonanone E                                                                                    | [28] |
|                                     |                                                                                                                   | 5,7,2'-trihydroxy-3',4'-methylenedioxy-8-methyl homoisoflavone                                       |      |
|                                     |                                                                                                                   | 7,2'-dihydroxy-5,8,4'-trimethoxy-6-methyl homoisoflavanone                                           |      |
|                                     |                                                                                                                   | 5,7,4'-trihydroxyhomoisoflavone                                                                      |      |
|                                     |                                                                                                                   | 5,7,4'-trihydroxy-6-methyl homoisoflavanone                                                          |      |
|                                     |                                                                                                                   | methylophiopogonanone A                                                                              |      |
|                                     |                                                                                                                   | 6-aldehydo-isoophiopogonone A                                                                        |      |
|                                     |                                                                                                                   | 6-formyl-isoophiopogonanone A                                                                        |      |
|                                     |                                                                                                                   | methylophiopogonanone A [syn. 5,7-dihydroxy-6,8-dimethyl-3-(3,4-methylenedioxybenzyl)-chroman-4-one] |      |
|                                     |                                                                                                                   | methylophiopogonanone B [syn. 5,7-dihydroxy-6,8-dimethyl-3-(4-methoxybenzyl)-chroman-4-one]          |      |
| Et <sub>2</sub> O/tuber             | SLH [MeOH], SLH [EtOH]                                                                                            | methylophiopogonone A [syn. 5,7-dihydroxy-6,8-dimethyl-3-(3,4-methylenedioxybenzyl)-chromone]        | [29] |
|                                     |                                                                                                                   | methylophiopogonone B [syn. 5,7-dihydroxy-6,8-dimethyl-3-(4-methoxybenzyl)-chromone]                 |      |
|                                     |                                                                                                                   | methylophiopogonone A [syn. 5,7-dihydroxy-6,8-dimethyl-3-(3,4-methylenedioxybenzyl)-chromone]        |      |
|                                     |                                                                                                                   | methylophiopogonone B [syn. 5,7-dihydroxy-6,8-dimethyl-3-(4-methoxybenzyl)-chromone]                 |      |
|                                     |                                                                                                                   | isoophiopogonone A                                                                                   |      |
|                                     |                                                                                                                   | ophiopogonone A                                                                                      |      |
|                                     |                                                                                                                   | ophiopogonone B                                                                                      |      |
|                                     |                                                                                                                   | ophiopogonanone E                                                                                    |      |
|                                     |                                                                                                                   | ophiopogonanone E                                                                                    |      |
|                                     |                                                                                                                   | ophiopogonanone E                                                                                    |      |
| Hydroethanolic<br>(70%)/rhizome     | CC [CHCl <sub>3</sub> –MeOH 100:0 to 85:15], SLH [CHCl <sub>3</sub> –MeOH 1:1], CC [CHCl <sub>3</sub> –MeOH 99:1] | ophiopogonanone E                                                                                    | [30] |
|                                     |                                                                                                                   | ophiopogonanone E                                                                                    |      |

|                                      |                         |                                                                                                                                     |                                                                                                            |      |
|--------------------------------------|-------------------------|-------------------------------------------------------------------------------------------------------------------------------------|------------------------------------------------------------------------------------------------------------|------|
|                                      |                         | CC [CHCl <sub>3</sub> –MeOH 100:0 to 85:15], SLH [CHCl <sub>3</sub> –MeOH 1:1], HPLC [MeCN–H <sub>2</sub> O 35:65]                  | desmethylophiopogonone B (syn. 5,7-dihydroxy-3-(4'-hydroxybenzyl)-8-methylchromone)                        |      |
|                                      |                         |                                                                                                                                     | 5,7-dihydroxy-6-methyl-3-(4'-hydroxy-benzyl)-chroman-4-one                                                 |      |
|                                      |                         |                                                                                                                                     | 5,7-dihydroxy -6-methyl-3-(4'-hydroxybenzyl)chromone                                                       |      |
|                                      |                         |                                                                                                                                     | 3-(2,4-dihydroxybenzyl)-5-hydroxyl- 7,8-dimethoxy-6-methylchroman-4-one                                    |      |
|                                      |                         |                                                                                                                                     | 5,7-dihydroxy-3-(4'-hydroxybenzyl) chromone                                                                |      |
|                                      | EtOAc/R                 | CC [CHCl <sub>3</sub> –MeOH 100:0 to 85:15], SLH [CHCl <sub>3</sub> –MeOH 1:1]                                                      | 4'-O-demethylophiopogonanone E                                                                             |      |
|                                      |                         |                                                                                                                                     | ophiopogonone D                                                                                            |      |
|                                      |                         |                                                                                                                                     | 5,7- dihydroxy-6-methyl-3-(2',4'-dihydroxybenzyl)chroman-4-one                                             |      |
|                                      |                         |                                                                                                                                     | 6-aldehydo-isoophiopogonanone A                                                                            |      |
|                                      |                         |                                                                                                                                     | 6-aldehydo-isoophiopogonanone B                                                                            |      |
| <i>Ornithogalum dubium</i><br>Houtt. | EtOH/bulb               | CC [PE–EtOAc 50:1, 20:1, 10:1, 5:1, 2:1], HSCCC [NHEX–EtOAc–MeOH–MeCN–H <sub>2</sub> O 3:2:3.5:1:0.5; 3:2:2.5:1:1.5]                | methylphiopogonanone A                                                                                     | [31] |
|                                      |                         |                                                                                                                                     | methylphiopogonanone B                                                                                     |      |
|                                      |                         |                                                                                                                                     | (3S)-5-hydroxy-7-methoxy-3-(4-methoxybenzyl)-4-chromanone                                                  |      |
|                                      |                         |                                                                                                                                     | (3R)-5-hydroxy-7-methoxy-3-(4-methoxybenzyl)-4-chromanone                                                  |      |
|                                      |                         |                                                                                                                                     | (3S)-5-hydroxy-7-methoxy-3-(4-hydroxybenzyl)-4-chromanone                                                  |      |
|                                      | EtOH/bulb               | CC [CH <sub>2</sub> Cl <sub>2</sub> ], SLH [MeOH–CH <sub>2</sub> Cl <sub>2</sub> ]                                                  | (3R)-3,5-dihydroxy-7-methoxy-3-(4'-hydroxybenzyl)-4-chromanone                                             | [88] |
|                                      |                         |                                                                                                                                     | (3R)-3-hydroxy-7-methoxy-3-(4-hydroxybenzyl)-4-chromanone 5-O-β-D-glucopyranoside                          |      |
|                                      |                         |                                                                                                                                     | (3R)-3-hydroxy-7-methoxy-3-(4-hydroxybenzyl)-5-O-β-D-glucopyranosyl-(1→6)-β-D-glucopyranoside-4-chromanone |      |
|                                      |                         |                                                                                                                                     | (3R)-5,7-dihydroxy-8-methyl-3-(2'-hydroxy-4'-methoxybenzyl)-chroman-4-one                                  |      |
|                                      |                         |                                                                                                                                     | (3R)-5,7-dihydroxy-6-methyl-3-(2'-hydroxy-4'-methoxybenzyl)-chroman-4-one (syn. polygonatone H)            |      |
| <i>Polygonatum cyrtoneura</i>        | EtOAc/rhizome           | CC [PE–EtOAc 100:1 to 2:1], CC [NHEX–Me <sub>2</sub> CO 4:1], SLH [CHCl <sub>3</sub> –MeOH 1:1], PTLC [NHEX–Me <sub>2</sub> CO 3:1] | 5,7-dihydroxy-6,8-dimethyl-3-(4'-hydroxybenzyl)-chroman-4-one                                              | [42] |
|                                      | petroleum ester/rhizome | CC, HPLC                                                                                                                            |                                                                                                            | [43] |
|                                      |                         | CC [petroleum ester–Me <sub>2</sub> CO 1:0 to 0:1], SLH [CHCl <sub>3</sub> –MeOH 1:1], HPLC [MeCN–H <sub>2</sub> O 25:75 to 60:40]  |                                                                                                            |      |

|                             |               |                                                                                                                                    |                                                                                                                                        |                                                                                                       |      |
|-----------------------------|---------------|------------------------------------------------------------------------------------------------------------------------------------|----------------------------------------------------------------------------------------------------------------------------------------|-------------------------------------------------------------------------------------------------------|------|
|                             |               |                                                                                                                                    |                                                                                                                                        | 5,7-dihydroxy-6,8-dimethyl-3-(2'-methoxy-4'-hydroxybenzyl)-chroman-4-one                              |      |
|                             |               |                                                                                                                                    |                                                                                                                                        | 5,7-dihydroxy-6-methyl-3-(4'-hydroxybenzyl)-chroman-4-one                                             |      |
|                             |               |                                                                                                                                    |                                                                                                                                        | 5,7-dihydroxy-8-methyl-3-(4'-hydroxybenzyl)-chroman-4-one                                             |      |
|                             |               |                                                                                                                                    |                                                                                                                                        | 5,7-dihydroxy-6-methyl-3-(4'-methoxybenzyl)-chroman-4-one                                             |      |
|                             |               |                                                                                                                                    |                                                                                                                                        | 5,7-dihydroxy-6,8-dimethyl-3-(4'-methoxybenzyl)-chroman-4-one                                         |      |
|                             |               |                                                                                                                                    |                                                                                                                                        | 5,7-dihydroxy-3-(4'-methoxybenzyl)-chroman-4-one                                                      |      |
|                             | EtOAc/rhizome | CC, HPLC                                                                                                                           | CC [petroleum ester–Me <sub>2</sub> CO 80:20 to 0:100], SLH [CHCl <sub>3</sub> –MeOH 1:1], HPLC [MeCN–H <sub>2</sub> O 25:75 to 60:40] | disporopsin                                                                                           |      |
|                             |               |                                                                                                                                    |                                                                                                                                        | 5,7-dihydroxy-3-(4'-hydroxybenzyl)-chroman-4-one                                                      |      |
|                             |               |                                                                                                                                    |                                                                                                                                        | 5,7-dihydroxy-6-methyl-3-(2',4'-dihydroxybenzyl)-chroman-4-one                                        |      |
|                             |               |                                                                                                                                    |                                                                                                                                        | 5,7-dihydroxy-3-(2'-hydroxy-4'-methoxybenzyl)-chroman-4-one                                           |      |
|                             |               |                                                                                                                                    |                                                                                                                                        | 5-dihydroxy-7-methoxy-6,8-dimethyl-3-(2'-hydroxy-4'-methoxybenzyl)-chroman-4-one                      |      |
|                             |               |                                                                                                                                    |                                                                                                                                        | polygonatone D                                                                                        |      |
| <i>Polygonatum odoratum</i> | PE/rhizome    | CC                                                                                                                                 |                                                                                                                                        | 5,7-dihydroxy-3-(4'-hydroxybenzylidene)-chroman-4-one                                                 | [32] |
|                             |               |                                                                                                                                    |                                                                                                                                        | (3 <i>R</i> )-5,7-dihydroxy-8-methoxy-3-(4-methoxybenzyl)-6-methylchrom-an-4-one (syn. odoratumone A) |      |
|                             | EtOAc/rhizome | CC [PE–Me <sub>2</sub> CO 98:2, 95:5, 90:10, 80:20, 50:50], CC [PE–EtOAc 50:1, 25:1, 10:1, 5:1], SLH [CHCl <sub>3</sub> –MeOH 4:1] |                                                                                                                                        | (3 <i>R</i> )-5,7,8-trihydroxy-3-(4-hydroxybenzyl)-6-methylchroman-4-one (syn. odoratumone B)         | [33] |
|                             |               |                                                                                                                                    |                                                                                                                                        | 3-(4'-methoxy-benzyl)-5,7-dihydroxy-6-methyl-8-methoxy-chroman-4-one (syn. methylodoratumanone A)     |      |
|                             |               |                                                                                                                                    |                                                                                                                                        | 3-(4'-methoxy-benzyl)-5,7-dihydroxy-6,8-dimethyl-chroman-4-one                                        |      |
|                             |               |                                                                                                                                    |                                                                                                                                        | 3-(4'-hydroxy-benzyl)-5,7-dihydroxy-6,8-dimethyl-chroman-4-one                                        |      |
|                             |               |                                                                                                                                    |                                                                                                                                        | 3-(4'-hydroxy-benzyl)-5,7-dihydroxy-6-methyl-8-methoxy-chroman-4-one                                  |      |
|                             |               |                                                                                                                                    |                                                                                                                                        | 3-(4'-hydroxy-benzyl)-5,7-dihydroxy-6-methyl-chroman-4-one                                            |      |

|                            |                                                                                                                                                                                               |                                                                                                 |      |
|----------------------------|-----------------------------------------------------------------------------------------------------------------------------------------------------------------------------------------------|-------------------------------------------------------------------------------------------------|------|
|                            | CC [PE–Me <sub>2</sub> CO 98:2, 95:5, 90:10, 80:20, 50:50], SLH                                                                                                                               | 3-(4'-hydroxy-benzyl)-5,7-dihydroxy-6-methyl-8-methoxy-chroman-4-one                            |      |
|                            |                                                                                                                                                                                               | 3-(4'-hydroxyl-benzyl)-5,7-dihydroxy-6-methyl-chroman-4-one                                     |      |
| EtOAc/R                    | HPLC [MeCN–H <sub>2</sub> O 40:60 (0.15% triethylamine, 0.18% formic acid)]                                                                                                                   | 2,3-dihydro-3-[(15-hydroxyphenyl)methyl]-5,7-dihydroxy-6-methyl-8-methoxy-4H-1-benzopyran-4-one | [34] |
|                            | CC [CHCl <sub>3</sub> –MeOH–H <sub>2</sub> O 100:0:0 to 50:50:5], CC [PE–EtOAc 95:5 to 50:50], CC [PE–EtOAc 9:1 to 7:3], SLH [CHCl <sub>3</sub> –MeOH 1:1], recryst.                          | 5,7-dihydroxy-6,8-dimethyl-3(R)-(3'-hydroxy-4'-methoxybenzyl)-chroman-4-one                     | [35] |
|                            | CC [CHCl <sub>3</sub> –MeOH–H <sub>2</sub> O 100:0:0 to 50:50:5], CC [PE–EtOAc 95:5 to 50:50], CC [PE–EtOAc 9:1 to 7:3], SLH [CHCl <sub>3</sub> –MeOH 1:1], CC [CHCl <sub>3</sub> –MeOH 95:5] | (±)-5,7-dihydroxy-6,8-dimethyl-3-(2'-hydroxy-4'-methoxybenzyl)-chroman-4-one                    |      |
|                            |                                                                                                                                                                                               | 5,7-dihydroxy-6,8-dimethyl-3-(4'-hydroxybenzyl)chroman-4-one                                    |      |
|                            | CC [CHCl <sub>3</sub> –MeOH–H <sub>2</sub> O 100:0:0 to 50:50:5], CC [PE–EtOAc 95:5 to 50:50], CC [PE–EtOAc 9:1 to 7:3], SLH [CHCl <sub>3</sub> –MeOH 1:1], SLH [MeOH]                        | (E)-5,7-dihydroxy-6,8-dimethyl-3-(4'-hydroxybenzylidene)chroman-4-one                           |      |
|                            | CC [CHCl <sub>3</sub> –MeOH–H <sub>2</sub> O 100:0:0 to 50:50:5], CC [EtOH–H <sub>2</sub> O 0:100, 30:70, 50:50, 70:30, 95:5], SLH [MeOH–H <sub>2</sub> O 8:2], SLH [MeOH]                    | 4'-demethyllleucomin 7-O-β-D-glucopyranoside                                                    |      |
|                            | CC [CHCl <sub>3</sub> –MeOH–H <sub>2</sub> O 100:0:0 to 50:50:5], CC [PE–EtOAc 95:5 to 50:50], CC [PE–Me <sub>2</sub> CO 8.5:1.5]                                                             | 5,7-dihydroxy-6-methyl-8-methoxy-3-(4'-methoxybenzyl)chroman-4-one                              |      |
|                            | CC [CHCl <sub>3</sub> –MeOH–H <sub>2</sub> O 100:0:0 to 50:50:5], CC [PE–EtOAc 95:5 to 50:50], CC [PE–EtOAc 8:2], SLH [CHCl <sub>3</sub> –MeOH 1:1]                                           | methylophiopogonanone B                                                                         |      |
|                            | CC [CHCl <sub>3</sub> –MeOH–H <sub>2</sub> O 100:0:0 to 50:50:5], CC [PE–EtOAc 95:5 to 50:50], PTLC [CHCl <sub>3</sub> –MeOH 95:5]                                                            | 5,7-dihydroxy-6-methyl-8-methoxy-3-(4'-hydroxybenzyl)chroman-4-one                              |      |
|                            |                                                                                                                                                                                               | ophiopogonanone E                                                                               |      |
| CHCl <sub>3</sub> /rhizome | SLH, PTLC                                                                                                                                                                                     | (E)-3-(3,4-dihydroxybenzylidene)-5,7-dihydroxy-6,8-dimethylchroman-4-one                        | [36] |
|                            |                                                                                                                                                                                               | (E)-3-(3,4-dihydroxybenzylidene)-5,7-dihydroxy-8-methoxy-6-methylchroman-4-one                  |      |
| EtOH/rhizome               | SLH and HPLC                                                                                                                                                                                  | (3R)-5,7-dihydroxyl-6-methyl-8-methoxyl-3-(4'-hydroxylbenzyl)-chroman-4-one                     | [37] |
|                            |                                                                                                                                                                                               | (3R)-5,7-dihydroxyl-6,8-dimethyl-3-(4'-hydroxylbenzyl)-chroman-4-one                            |      |
|                            |                                                                                                                                                                                               | (3R)-5,7-dihydroxyl-6-methyl-3-(4'-hydroxylbenzyl)-chroman-4-one                                |      |

|                              |                                                                                  |  |                                                                               |      |
|------------------------------|----------------------------------------------------------------------------------|--|-------------------------------------------------------------------------------|------|
|                              |                                                                                  |  | polygonatone A                                                                |      |
|                              |                                                                                  |  | polygonatone B                                                                |      |
|                              |                                                                                  |  | polygonatone C                                                                |      |
| EtOAc/n.d                    | PTLC                                                                             |  | 5,7-dihydroxy-6,8-dimethyl-3-(4'-hydroxybenzyl)chroman-4-one                  | [38] |
|                              | CC [NHEX-EtOAc]                                                                  |  | 5,7-dihydroxy-6-methyl-8-methoxy-3-(4'-hydroxybenzyl)chroman-4-one            |      |
| EtOAc/rhizome                | HPLC [MeCN-H <sub>2</sub> O (0.18% HCO <sub>2</sub> H) 60:40]                    |  | 5,7-dihydroxy-3-(4'-hydroxybenzyl)-6-methylchroman-4-one                      | [39] |
|                              |                                                                                  |  | 5,7-dihydroxy-3-(4'-hydroxybenzyl)-6-methyl-8-methoxychroman-4-one            |      |
|                              |                                                                                  |  | 5,7-dihydroxy-3-(4'-hydroxybenzyl)-6, 8-dimethylchroman-4-one                 |      |
| CHCl <sub>3</sub> /rhizome   | RP-CC [MeOH-H <sub>2</sub> O 70:30 to 100:0], HPLC [MeOH-H <sub>2</sub> O 60:40] |  | 3-(4'-hydroxybenzyl)-5,7-dihydroxy-6-methyl-8-methoxychroman-4-one            | [40] |
|                              | RP-CC [MeOH-H <sub>2</sub> O 70:30 to 100:0], HPLC [MeOH-H <sub>2</sub> O 65:35] |  | 3-(4'-hydroxybenzyl)-5,7-dihydroxy-6,8-dimethylchroman-4-one                  |      |
|                              | RP-CC [MeOH-H <sub>2</sub> O 70:30 to 100:0], HPLC [MeOH-H <sub>2</sub> O 70:30] |  | 3-(4'-methoxybenzyl)-5,7-dihydroxy-6-methyl-8-methoxychroman-4-one            |      |
| hydroethanolic (60%)/rhizome | HSCCC [PE-EtOAc-MeOH-H <sub>2</sub> O 2:3:3:2], SLH [MeOH-MeCN 1:1]              |  | (3R)-5,7-dihydroxy-8-methyl-3-(2',4'-dihydroxybenzyl)-chroman-4-one           | [41] |
|                              |                                                                                  |  | (3R)-5,7-dihydroxy-8-methyl-3-(4'-hydroxybenzyl)-chroman-4-one                |      |
|                              |                                                                                  |  | (3R)-5,7-dihydroxy-3-(2'-hydroxy-4'-methoxybenzyl)-chroman-4-one              |      |
|                              |                                                                                  |  | (3R)-5,7-dihydroxy-3-(4'-hydroxybenzyl)-chroman-4-one                         |      |
|                              |                                                                                  |  | (3R)-5,7-dihydroxy-6-methoxy-8-methyl-3-(2',4'-dihydroxybenzyl)-chroman-4-one |      |
|                              |                                                                                  |  | (3R)-5,7-dihydroxy-8-methoxy-3-(2'-hydroxy-4'-methoxybenzyl)-chroman-4-one    |      |
|                              |                                                                                  |  | (3R)-5,7-dihydroxy-6-methyl-3-(4'-hydroxybenzyl)-chroman-4-one                |      |
|                              |                                                                                  |  | (3R)-5,7-dihydroxy-6-methyl-8-methoxy-3-(4'-hydroxybenzyl)-chroman-4-one      |      |
|                              |                                                                                  |  | (3R)-5,7-dihydroxy-6,8-dimethyl-3-(4'-hydroxybenzyl)-chroman-4-one            |      |

|                                   |                                       |                                                                                                                                                                                                                                       |                                                                                                  |      |
|-----------------------------------|---------------------------------------|---------------------------------------------------------------------------------------------------------------------------------------------------------------------------------------------------------------------------------------|--------------------------------------------------------------------------------------------------|------|
| <i>Polygonatum verticillatum</i>  | CHCl <sub>3</sub> –EtOAc/rhizome      | HSCCC [PE–EtOAc–MeOH–H <sub>2</sub> O 2:3:3:2], recryst.<br>CC [Bz–EtOAc 10:0 to 0:10], RP-CC [MeOH–H <sub>2</sub> O 70:30]<br>CC [Bz–EtOAc 10:0 to 0:10], CC [NHEX–EtOAc 80:20]<br>CC [Bz–EtOAc 10:0 to 0:10], CC [NHEX–EtOAc 85:15] | (3 <i>R</i> )-5,7-dihydroxy-6-methyl-8-methoxy-3-(4'-methoxybenzyl)-chroman-4-one                | [44] |
|                                   |                                       |                                                                                                                                                                                                                                       | (3 <i>R</i> )-5,7-dihydroxy-3-(2',4'-dihydroxybenzyl)-chroman-4-one                              |      |
|                                   |                                       |                                                                                                                                                                                                                                       | 5,7-dihydroxy-3-(4-methoxybenzyl)-8-methyl chroman-4-one                                         |      |
|                                   |                                       |                                                                                                                                                                                                                                       | 5,7-dihydroxy-3-(2-hydroxy-4-methoxybenzyl)-8-methylchroman-4-one                                |      |
| <i>Pseudoprospero firmifolium</i> | CH <sub>2</sub> Cl <sub>2</sub> /bulb | CC [CH <sub>2</sub> Cl <sub>2</sub> –EtOAc]                                                                                                                                                                                           | 5,7-dihydroxy-3-(2-hydroxy-4-methoxybenzyl)-chroman-4-one                                        | [89] |
|                                   |                                       |                                                                                                                                                                                                                                       | 3,5-dihydroxy-7,8-dimethoxy-3-(3',4'-dimethoxybenzyl)-4-chromanone                               |      |
|                                   |                                       |                                                                                                                                                                                                                                       | 3,5-dihydroxy-7-methoxy-3-(3',4'-dimethoxybenzyl)-4-chromanone                                   |      |
|                                   |                                       |                                                                                                                                                                                                                                       | 3,5-dihydroxy-7,8-dimethoxy-3-(3'-hydroxy-4'-methoxybenzyl)-4-chromanone                         |      |
|                                   |                                       |                                                                                                                                                                                                                                       | 3,5,6-trihydroxy-7-methoxy-3-(3'-hydroxy-4'-methoxybenzyl)-4-chromanone                          |      |
|                                   |                                       |                                                                                                                                                                                                                                       | 3,5,7-trihydroxy-3-(3'-hydroxy-4'-methoxybenzyl)-4-chromanone                                    |      |
| <i>Resnova humifusa</i>           | CH <sub>2</sub> Cl <sub>2</sub> /bulb | CC [EtOAc–CH <sub>2</sub> Cl <sub>2</sub> 3:2]                                                                                                                                                                                        | 4'-demethyl-3,9-dihydroeucomin                                                                   | [68] |
|                                   |                                       |                                                                                                                                                                                                                                       | 5,6-dimethoxy-7-hydroxy-3-(4'-hydroxybenzyl)-4-chromanone                                        |      |
|                                   |                                       |                                                                                                                                                                                                                                       | 8- <i>O</i> -demethyl-7- <i>O</i> -methyl-3,9-dihdropunctatin                                    |      |
|                                   |                                       |                                                                                                                                                                                                                                       | 4'- <i>O</i> -demethyleucomol                                                                    |      |
|                                   |                                       |                                                                                                                                                                                                                                       | eucomol                                                                                          |      |
|                                   | MeOH/bulb                             | CC [EtOAc–CH <sub>2</sub> Cl <sub>2</sub> 1:4]                                                                                                                                                                                        | 3,9-dihydroeucomin                                                                               | [69] |
|                                   |                                       |                                                                                                                                                                                                                                       | 5,7-dihydroxy-3-(3'-hydroxy-4'-methoxybenzyl)-4-chromanone                                       |      |
|                                   |                                       |                                                                                                                                                                                                                                       | 7- <i>O</i> -methyl-3,9-dihdropunctatin                                                          |      |
|                                   |                                       |                                                                                                                                                                                                                                       | 3',5,7-trihydroxy-4'-methoxyspiro[2H-1-benzopyran-3(4H),7'-bicyclo[4.2.0]octa-1,3,5-trien]-4-one |      |
|                                   |                                       |                                                                                                                                                                                                                                       | ( <i>R</i> )-5,7-dihydroxy-8-methoxy-3-(4'-hydroxybenzyl)-4-chromanone                           |      |
|                                   |                                       |                                                                                                                                                                                                                                       | ( <i>R</i> )-7,8-dimethoxy-5-hydroxy-3-(4'-hydroxybenzyl)-4-chromanone                           |      |

|                                                 |                                       |                                                                                                              |                                                                           |      |
|-------------------------------------------------|---------------------------------------|--------------------------------------------------------------------------------------------------------------|---------------------------------------------------------------------------|------|
|                                                 |                                       |                                                                                                              | (R)-5,8-dihydroxy-7-methoxy-3-(4'-hydroxybenzyl)-4-chromanone             |      |
|                                                 |                                       | CC [CH <sub>2</sub> Cl <sub>2</sub> –MeOH 99:1]                                                              | (R)-7-hydroxy-5-methoxy-3-(4'-hydroxybenzyl)-4-chromanone                 |      |
| <i>Rhodocodon aff. intermedius</i>              | CH <sub>2</sub> Cl <sub>2</sub> /bulb | FC [NHEX, NHEX–CH <sub>2</sub> Cl <sub>2</sub> , MeOH], CC [MeOH–NHEX–CH <sub>2</sub> Cl <sub>2</sub> 1:4:5] | (E)-5,6,7-trihydroxy-3-(3'-hydroxy-4'-methoxybenzylidene)-4-chromanone    | [75] |
|                                                 |                                       |                                                                                                              | (E)-5,7-dihydroxy-3-(3'-hydroxy-4'-methoxybenzylidene)-4-chromanone       |      |
|                                                 |                                       |                                                                                                              | (3S)-5,6-dihydroxy-7-methoxy-3-(3'-hydroxy-4'-methoxybenzyl)-4-chromanone |      |
| <i>Rhodocodon campanulatus</i>                  | EtOH/bulb                             | SLH [CH <sub>2</sub> Cl <sub>2</sub> –MeOH 1:1], CC                                                          | (3S)-5,7-dihydroxy-3S-(3'-hydroxy-4'-methoxybenzyl)-4-chromanone          | [75] |
|                                                 |                                       | n.d                                                                                                          | 2,5,7-dihydroxy-3-(3-hydroxy-4-methoxybenzyl) chroman-4-one               | [76] |
| <i>Rhodocodon cryptopodus</i>                   | EtOH/bulb                             | CC                                                                                                           | 3S-5,7-dihydroxy-(3'-hydroxy-4'-methoxybenzyl)-4-chromanone               | [77] |
| <i>Rhodocodon rotundus</i>                      | EtOH/bulb                             | FC                                                                                                           | 3S-5,7-dihydroxy-(4'-hydroxy-3'-methoxybenzyl)-4-chromanone               | [77] |
| <i>Scilla dracomontana</i>                      | ether/bulb                            | CC                                                                                                           | 5,7-dihydroxy-6-methoxy-3-(4-methoxybenzyl)chroman-4-one                  | [48] |
|                                                 |                                       |                                                                                                              | eucomol                                                                   |      |
| <i>Scilla kraussii</i>                          | ether/bulb                            | CC                                                                                                           | 5,7-dihydroxy-3-(3-hydroxy-4-methoxybenzyl)chroman-4-one                  | [48] |
| <i>Scilla natalensis</i>                        | NHEX/bulb                             | CC                                                                                                           | 5,7-dihydroxy-6-methoxy-3-(3-methoxybenzyl)chroman-4-one                  | [48] |
|                                                 |                                       |                                                                                                              | 5,7-dihydroxy-6-methoxy-3-(4-hydroxybenzyl)chroman-4-one                  |      |
| <i>Scilla nervosa</i>                           | NHEX, EtOAc/bulb                      | n.d                                                                                                          | 5,7-dimethoxy-3-(4-methoxybenzyl)chroman-4-one                            | [48] |
|                                                 |                                       |                                                                                                              | 5-hydroxy-7-methoxy-3-(3-hydroxy-4-methoxybenzyl)chroman-4-one            |      |
|                                                 |                                       |                                                                                                              | 5,7-dimethoxy-3-(4-hydroxybenzyl)chroman-4-one                            |      |
|                                                 | EtOAc/bulb                            | n.d                                                                                                          | 5-hydroxy-7-methoxy-3-(4-methoxybenzyl)chroman-4-one                      |      |
|                                                 |                                       |                                                                                                              | 5,7-dimethoxy-3-(4-hydroxy benzylidene)chroman-4-one                      |      |
| <i>Scilla nervosa</i> subsp. <i>rigidifolia</i> | EtOAc/bulb                            | PTLC                                                                                                         | 3-(4'-methoxybenzyl)-6,7-dihydroxy-5-methoxychroman-4-one                 | [45] |

|                                     |                                                                                |                                         |                                                                    |      |
|-------------------------------------|--------------------------------------------------------------------------------|-----------------------------------------|--------------------------------------------------------------------|------|
|                                     |                                                                                |                                         | 3-(3'-hydroxy-4'-methoxybenzyl)-5,7-dimethoxychroman-4-one         |      |
|                                     |                                                                                |                                         | 3-(4'-methoxybenzylidene)-5,7-dihydroxy-6-methoxychroman-4-one     |      |
|                                     |                                                                                |                                         | 3-(4'-hydroxybenzylidene)-5,7-dihydroxy-6-methoxychroman-4-one     |      |
|                                     |                                                                                | SLH [CHCl <sub>3</sub> –MeOH 7:3], PTLC | 3-(4'-hydroxybenzylidene)-5,7-dihydroxychroman-4-one               |      |
|                                     |                                                                                |                                         | 3-(4'-methoxybenzyl)-6-hydroxy-5,7-dimethoxychroman-4-one          |      |
|                                     |                                                                                |                                         | 3-(4'-methoxybenzyl)-5,7-dimethoxychroman-4-one                    |      |
| MeOH–CHCl <sub>3</sub> (20:80)/bulb | CC [CHCl <sub>3</sub> –EtOAc 4:1]                                              |                                         | 3-(4-hydroxybenzylidene)-5,7-dihydroxychroman-4-one                | [46] |
|                                     |                                                                                |                                         | 3-(4-hydroxybenzylidene)-5,7-dihydroxy-6-methoxychroman-4-one      |      |
|                                     | CC [NHEX–CHCl <sub>3</sub> ], PTLC [CHCl <sub>3</sub> ]                        |                                         | 3-(4-hydroxy-3-methoxybenzyl)-5-hydroxy-6,7-dimethoxychroman-4-one |      |
|                                     |                                                                                |                                         | 3-(4-methoxybenzyl)-8-hydroxy-5,7-dimethoxychroman-4-one           |      |
|                                     |                                                                                |                                         | 3-(3,4-dimethoxybenzyl)-5,7-dihydroxychroman-4-one                 |      |
|                                     |                                                                                |                                         | 3-(4-hydroxybenzylidene)-5-hydroxy-7-methoxychroman-4-one          |      |
|                                     |                                                                                |                                         | 3-(4-methoxybenzylidene)-5,7-dihydroxy-6-methoxychroman-4-one      |      |
|                                     | FC [NHEX–CHCl <sub>3</sub> 1:1]                                                |                                         | 3-(4-methoxybenzyl)-5,7-dimethoxychroman-4-one                     |      |
|                                     | PTLC                                                                           |                                         | 3-(4-hydroxy-3-methoxybenzyl)-5-hydroxy-7-methoxychroman-4-one     |      |
|                                     | PTLC [CHCl <sub>3</sub> –EtOAc 9:1]                                            |                                         | 3-(4-hydroxybenzyl)-5,6,7-trimethoxychroman-4-one                  |      |
|                                     |                                                                                |                                         | 3-(3-hydroxy-4-methoxybenzyl)-5,7-dihydroxychroman-4-one           |      |
|                                     | recrys. [CH <sub>2</sub> Cl <sub>2</sub> ]                                     |                                         | 3-(4-hydroxybenzyl)-5,7-dihydroxy-6-methoxychroman-4-one           |      |
|                                     | CC [CHCl <sub>3</sub> –EtOAc 9:1], CC [NHEX–EtOAc]                             |                                         | 3-(4-methoxybenzyl)-6-hydroxy-5,7-dimethoxychroman-4-one           |      |
| NHEX/bulb                           | CC [CHCl <sub>3</sub> –EtOAc, EtOAc–MeOH], PTLC [CHCl <sub>3</sub> –MeOH 24:1] |                                         | 3-(4'-methoxybenzyl)-5,6,7-trimethoxychroman-4-one                 | [47] |
|                                     | SLH [CHCl <sub>3</sub> –EtOAc 7:3]                                             |                                         | 3-(4'-methoxybenzyl)-5,7-dimethoxychroman-4-one                    |      |



|                               |                         |                                          |                                                                                                                                             |      |
|-------------------------------|-------------------------|------------------------------------------|---------------------------------------------------------------------------------------------------------------------------------------------|------|
|                               |                         | SLH, PTLC                                | 3-(4'-methoxybenzyl)-7-hydroxy-5,6-dimethoxychroman-4-one                                                                                   |      |
|                               |                         |                                          | 3-(4'-methoxybenzyl)-6-hydroxy-5,7-dimethoxychroman-4-one                                                                                   |      |
|                               |                         | PTLC [CHCl <sub>3</sub> -MeOH 24:1]      | 3-(3'-hydroxy-4'-methoxybenzyl)-5,7-dihydroxy-6-methoxychroman-4-one                                                                        |      |
|                               |                         |                                          | 3-(3'-hydroxy-4'-methoxybenzyl)-5,7-dihydroxychroman-4-one                                                                                  |      |
| <i>Scilla persica</i> HAUSSKN | CHCl <sub>3</sub> /bulb | SLH [MeOH]                               | 3-(4'-hydroxybenzylidene)-5,7-dihydroxy-6-methoxychroman-4-one                                                                              |      |
|                               |                         |                                          | 3-(4'-hydroxybenzylidene)-5,7-dihydroxychroman-4-one                                                                                        |      |
|                               | Et <sub>2</sub> O/bulb  | SLH [MeOH]                               | 3-(3',4'-dihydroxybenzyl)-8-hydroxy-5,7-dimethoxychroman-4-one (syn. scillapersicone)                                                       | [51] |
|                               |                         |                                          | 3-(3',4'-dihydroxybenzylidene)-8-hydroxy-5,7-dimethoxychroman-4-one (syn. scillapersicene)                                                  | [52] |
|                               |                         |                                          | 3-(3',4'-dihydroxybenzyl)-5,8-dihydroxy-7-methoxychroman-4-one                                                                              |      |
|                               |                         |                                          | 3,9-dihydro-autumnalin                                                                                                                      |      |
|                               |                         |                                          | 3-(3',4'-dihydroxybenzylidene)-5,8-dihydroxy-7-methoxychroman-4-one                                                                         |      |
|                               |                         |                                          | scillapersicone                                                                                                                             |      |
|                               |                         | CC [CHCl <sub>3</sub> -MeOH 10:0 to 0:4] | autumnalin                                                                                                                                  |      |
| <i>Scilla scilloides</i>      | EtOAc/bulb              | CC, SLH, HPLC                            | (3 <i>S</i> )-3-(3,4-dihydroxybenzyl)-5-hydroxy-6,7-dimethoxychroman-4-one (syn. scillavone B)                                              | [50] |
|                               |                         |                                          | 3,9-dihydroeucomnalin                                                                                                                       |      |
|                               |                         |                                          | 3-(3,4-dihydroxybenzyl)-5,7-dihydroxy-6-methoxychroman-4-one                                                                                |      |
|                               |                         |                                          | 3-(4-hydroxybenzylidene)-5,7-dihydroxychroman-4-one                                                                                         |      |
|                               |                         |                                          | 3-(3,4-dihydroxybenzylidene)-5,7-dihydroxy-6-methoxychroman-4-one                                                                           |      |
|                               |                         |                                          | (3 <i>R</i> )-5,7,2'-trihydroxy-3',4'-dimethoxyspiro{2 <i>H</i> -1-benzopyran-7'-bicyclo[4,2,0]octa[1,3,5]-trien}-4-one (syn. scillavone A) |      |
|                               |                         |                                          | 5,7,3'-trihydroxy-4'-methoxyspiro{2 <i>H</i> -1-benzopyran-7'-bicyclo[4,2,0]octa[1,3,5]-trien}-4-one                                        |      |

|                               |                                     |  |  |                                                                                             |      |
|-------------------------------|-------------------------------------|--|--|---------------------------------------------------------------------------------------------|------|
|                               |                                     |  |  | scillascillin                                                                               | [49] |
|                               |                                     |  |  | 2-hydroxy-scillascillin                                                                     |      |
|                               |                                     |  |  | HPLC [CHCl <sub>3</sub> –MeOH 50:1]                                                         |      |
|                               |                                     |  |  | 3-(3,4-dihydroxybenzyl)-5,7-dihydroxy-6-methoxychroman-4-one                                |      |
|                               |                                     |  |  | 3-(4-hydroxybenzylidene)-5,7-dihydroxychroman-4-one                                         |      |
|                               |                                     |  |  | scillavone A                                                                                |      |
|                               |                                     |  |  | HPLC [NHEX–Me <sub>2</sub> CO 2:1]                                                          |      |
|                               |                                     |  |  | 3-(3,4-dihydroxybenzylidene)-5,7-dihydroxy-6-methoxychroman-4-one                           |      |
|                               |                                     |  |  | scillavone B                                                                                |      |
|                               |                                     |  |  | HPLC [MeOH–H <sub>2</sub> O 50:50], HPLC [CHCl <sub>3</sub> –MeOH 50:1]                     |      |
| <i>Urginea depressa</i>       | CH <sub>2</sub> Cl <sub>2</sub> /WP |  |  | 5,7,3'-trihydroxy-4'-methoxyspiro[2H-1-benzopyran-7'-bicyclo[4,2,0]octa[1,3,5]-trien]-4-one | [90] |
|                               |                                     |  |  | 2-hydroxy-scillascillin                                                                     |      |
|                               |                                     |  |  | 3,9-dihydroeucomnalin                                                                       |      |
|                               |                                     |  |  | HPLC [MeOH–H <sub>2</sub> O 65:35], recryst.                                                |      |
|                               | NHEX/WP                             |  |  | scillascillin                                                                               |      |
|                               |                                     |  |  | HPLC [MeCN–H <sub>2</sub> O 3.5:10]                                                         |      |
|                               |                                     |  |  | urgineanin A                                                                                |      |
|                               |                                     |  |  | urgineanin D                                                                                |      |
| <i>Veltheimia viridifolia</i> | PE/bulb                             |  |  | HPLC [MeCN–H <sub>2</sub> O 4:10]                                                           | [91] |
|                               |                                     |  |  | HPLC [MeCN–H <sub>2</sub> O 4:10]                                                           |      |
|                               |                                     |  |  | HPLC [MeCN–H <sub>2</sub> O 3.5:10]                                                         |      |
|                               | Et <sub>2</sub> O/bulb              |  |  | urgineanin B                                                                                |      |
|                               |                                     |  |  | urgineanin C                                                                                |      |
|                               |                                     |  |  | urgineanin E                                                                                |      |
|                               |                                     |  |  | HPLC [NHEX–Et <sub>2</sub> O 8:2 to 0:10]                                                   | [91] |
|                               |                                     |  |  | R(–)-3-(4-hydroxybenzyl)-5-hydroxy-6,7,8-trimethoxychroman-4-one                            |      |
|                               |                                     |  |  | HPLC [CHCl <sub>3</sub> –MeOH 95:5]                                                         |      |
|                               |                                     |  |  | muscomin                                                                                    |      |

AP: aerial part; Bz: benzene; CC: column chromatography; CHCl<sub>3</sub>: chloroform; CH<sub>2</sub>Cl<sub>2</sub>: dichloromethane; Et<sub>2</sub>O: diethyl ether; EtOAc: ethyl acetate; EtOH: ethanol; FC: flash chromatography; Fr: fruit; H<sub>2</sub>O: water; HCO<sub>2</sub>H: formic acid; HOAc: acetic acid; HPLC: high-performance liquid chromatography; HSCCC: high-speed counter-current chromatography; *i*-PrOH: isopropyl alcohol; L: leaf; MeOH: methanol; Me<sub>2</sub>CO: acetone; MeCN: acetonitrile; MPLC: medium-pressure liquid chromatography; *n*-BuOH: butanol; n.d.: not determined; NHEX: *n*-hexane; PE: petroleum ether; PTLC: preparative-thin layer chromatography; R: root; recryst.: recrystallization; RP-CC: reverse-phase column chromatography; RP-PTLC: reverse-phase preparative-thin layer chromatography; SLH: Sephadex® LH-20; St: stem; WP: whole part
